# *Spodoptera littoralis* genome mining brings insights on the dynamic of expansion of gustatory receptors in polyphagous noctuidae

Camille Meslin\*, Pauline Mainet\*, Nicolas Montagné\*, Stéphanie Robin<sup>†,‡</sup>, Fabrice Legeai<sup>†,‡</sup>,  
Anthony Bretaudeau<sup>†,‡</sup>, J. Spencer Johnston<sup>§</sup>, Fotini Koutroumpa<sup>\*,\*\*</sup>, Emma Persyn<sup>\*,††</sup>,  
Christelle Monsempès\*, Marie-Christine François\*, Emmanuelle Jacquin-Joly\*

\* INRAE, Sorbonne Université, CNRS, IRD, UPEC, Université de Paris, Institut d'Ecologie et  
des Sciences de l'Environnement de Paris (iEES-Paris), 78026 Versailles, France.

<sup>†</sup> INRAE, UMR Institut de Génétique, Environnement et Protection des Plantes (IGEPP),  
BioInformatics Platform for Agroecosystems Arthropods (BIPAA), Campus Beaulieu, 35042  
Rennes, France.

<sup>‡</sup> INRIA, IRISA, GenOuest Core Facility, Campus de Beaulieu, Rennes, 35042, France.

<sup>§</sup> Department of Entomology, Texas A&M, University, College Station, TX 77843, USA.

\*\* Current affiliation: INRAE, Université Tours, Infectiologie et Santé Publique (ISP), F37380  
Nouzilly, France.

<sup>††</sup> CIRAD, UMR PVBMT, F-97410, St Pierre, Réunion, France.

Running head: *Spodoptera littoralis* genome

Key words: *Spodoptera littoralis*, gustatory receptor, transposable elements

## Abstract

The bitter taste, triggered via gustatory receptors, serves as an important natural defense against the ingestion of poisonous foods in animals, and the diversity of food diet is usually linked to an increase in the number of gustatory receptor genes. This has been especially observed in polyphagous insect species, such as noctuid species from the *Spodoptera* genus. However, the dynamic and physical mechanisms leading to these gene expansions and the evolutionary pressures behind them remain elusive. Among major drivers of genome dynamics are the transposable elements but, surprisingly, their potential role in insect gustatory receptors expansion has not been considered yet.

In this work, we hypothesized that transposable elements and possibly positive selection would be involved in the active dynamic of gustatory receptor evolution in *Spodoptera spp.* We first sequenced *de novo* the full 465Mb genome of *S. littoralis*, and manually annotated all chemosensory genes, including a large repertoire of 373 gustatory receptor genes (including 19 pseudogenes). We also improved the completeness of *S. frugiperda* and *S. litura* gustatory receptor repertoires. Then, we annotated transposable elements and revealed that a particular category of class I retrotransposons, the SINE transposons, was significantly enriched in the vicinity of gustatory receptor gene clusters, suggesting a transposon-mediated mechanism for the formation of these clusters. Selection pressure analyses indicated that positive selection within the gustatory receptor gene family is cryptic, only 7 receptors being identified as positively selected.

Altogether, our data provide a new good quality *Spodoptera* genome, pinpoint interesting gustatory receptor candidates for further functional studies and bring valuable genomic information on the mechanisms of gustatory receptor expansions in polyphagous insect species.

## Introduction

Animals rely heavily on their sense of taste to discriminate between harmful poisonous foods, usually through the detection of bitter taste, and beneficial sustenance. Interestingly, narrowness of food diets in animals is usually linked to a decreased number of gustatory receptors (GRs), in both mammals such as the blood-feeder bats<sup>1</sup>, and in insects such as the body louse<sup>2</sup> - an obligate ectoparasite of human -, the fig wasp *Ceratosolen solmsi*<sup>3</sup> - specialized on *Ficus* - and many Lepidoptera specialist feeders, although mammals and insect GRs are unrelated. Reversely, the diversity of food diet is usually linked to GR gene expansions. This has been especially observed in polyphagous insects, including omnivorous species such as the American cockroach *Periplaneta americana*<sup>4</sup> and herbivorous species such as noctuid species<sup>5-7</sup>.

In polyphagous noctuids, the sequencing of the genomes of *Spodoptera frugiperda* and *S. litura* revealed GR repertoires of 231 and 237 genes<sup>5,8</sup>, respectively, more than twice as much compared to other monophagous and oligophagous Lepidoptera species (*Bombyx mori*: 69 genes, *Heliconius melpomene*: 73 genes)<sup>9-12</sup>, suggesting that the number of GRs has greatly increased during evolution in polyphagous Lepidoptera via gene tandem duplication. The genomic architecture of the GR family is thus well known in these species and, together with previous studies, it supports the evidence that the family evolved under a birth-and-death model as well as under different selective pressures depending on the clade considered<sup>10,13-15</sup>. Most of these GRs belong to clades grouping the so-called “bitter” receptors, but in fact the function of the majority of these GRs remains enigmatic. Although the bitter GR class exhibits the most dynamic evolution, the mechanisms leading to GR expansions and the evolutionary pressures behind them remain elusive. Among major drivers of genome dynamics are the transposable elements (TEs). TEs are very diverse and are distributed along genomes in a non-random way<sup>16</sup>. Similar or identical TEs can induce chromosomal rearrangements such as deletions,

68 insertions and even duplications<sup>17–19</sup>, features that are frequent in multigene families such as  
69 GRs. Surprisingly, their potential role in insect GR expansion has not been considered yet.  
70 In order to study in more details GRs evolution and the potential role of TEs in GRs expansion,  
71 we sequenced an additional genome of a Spodoptera species: *Spodoptera littoralis*. So far, only  
72 38 GRs identified<sup>20–22</sup> in *S. littoralis* whereas several hundreds of GRs were annotated in its  
73 counterparts *S. litura* and *S. frugiperda*. To investigate this singularity, we report here the  
74 sequencing of the *S. littoralis* genome, its full assembly, functional automatic annotation and  
75 expert annotation of all chemosensory gene families, namely soluble carrier proteins (odorant-  
76 binding proteins: OBPs, and chemosensory proteins: CSPs)<sup>23</sup> and the three major families of  
77 insect chemosensory receptors (odorant receptors: ORs, ionotropic receptors: IRs and GRs)<sup>24</sup>.  
78 With a particular focus on gustation, we also reannotated GRs in *S. litura* and *S. frugiperda*.  
79 Then, we analyzed the evolutionary history of GRs, by looking at the enrichment for  
80 transposable elements in the vicinity of GRs and by analyzing selective pressures acting on the  
81 different GR clades.

## Methods and Materials

### Estimation of *Spodoptera littoralis* genome size

The genome size of *Spodoptera littoralis* was estimated using flow cytometry. Genome size estimates were produced as described before<sup>25</sup>. In brief, the head of a *S. littoralis* along with the head of a female *Drosophila virilis* standard (1C = 328 Mbp) were placed into 1 ml of Galbrath buffer in a 2 ml Kontes Dounce and ground with 15 strokes of the A pestle. The released nuclei were filtered through a 40 µM nylon filter and stained with 25 µg/mL propidium iodide for 2 hours in the cold and dark. The average red fluorescence of the 2C nuclei was scored with a Partec C flow cytometer emitting at 514 nm. The 1C genome size of *S. littoralis* was estimated as (average red fluorescence of the 2C *S. littoralis* peak) / (average fluorescence of the 2C *D. virilis* peak) X 328 Mbp.

### *Spodoptera littoralis* genome sequencing and assembly

#### Biological material and genomic DNA extraction

Whole genomic DNA was extracted from two male larvae obtained after two inbred generations resulting from a single pair of *S. littoralis* originating from a laboratory colony maintained in INRAE Versailles since 2000s on suitable laboratory diet (Poitout and Bues 1974). The sex of individuals was verified by checking for presence of testis. The gut was removed and DNA extraction was performed from whole, late-stage larvae using Qiagen Genomic-tip 500/G (Qiagen Inc., Chatsworth, CA, USA). A total of 30 µg of genomic DNA was obtained.

#### Sequencing

Different types of libraries were generated for two sequencing technologies: Illumina and PacBio. For Illumina sequencing, five libraries were prepared and constructed according to the Illumina manufacturer's protocol (one library of 170, one of 250 and three of 500 bp). Illumina sequencing was performed at the BGI-tech facilities (Shenzhen, China) on a HiSeq2500 machine. Around 68 Gb were obtained, representing 144X of the estimated genome size (470 Mb) (Supp data 1). The raw reads were filtered at BGI to remove adapter sequences,

contaminations and low-quality reads and the quality of all raw reads was assessed using FASTQC (Andrews S. <http://www.bioinformatics.babraham.ac.uk/projects/fastqc/>). PacBio sequencing was performed at GenoScreen (Lille, France) by the SMRT sequencing technology on 9 SMRTcell RSII, generating 2 846 820 reads. Around 16 Gb were obtained, representing 34X of the estimated genome size (Supp data 1). High quality sequences were obtained by generating circular consensus sequencing (CCS).

### ***Genome assembly***

A first assembly was done using Platanus (v1.2.1)<sup>26</sup> with Illumina data. A second assembly was obtained by doing scaffolding with SSPACE-LR (modified)<sup>27</sup> using PacBio data and gap filling using GapCloser<sup>28</sup>. These second assembly was evaluated using Benchmarking Universal Single-Copy Orthologue (BUSCO v3.0.2)<sup>29</sup> with a reference set of 1,658 genes conserved in Insecta.

### **Structural and functional genome annotation**

Structural automatic genome annotation was done with BRAKER (v1.11)<sup>30</sup> using all RNAseq data described in Supp data 1. RNAseq libraries were sequenced from different larvae and adult tissues from males and females including the proboscis, palps, legs and ovipositor and sequenced by Illumina (Supp data 1)<sup>20-22</sup>. Reads were trimmed using Trimmomatic (v0.36)<sup>31</sup> with the following parameters : ILLUMINACLIP:TruSeq2-PE.fa:2:30:10, LEADING:3, TRAILING:3, SLIDINGWINDOW:4:15, MINLEN:36. Trimmed reads were mapped on the genome assembly using STAR (v.5.2a)<sup>32</sup> with the default parameters except for the following parameters : outFilterMultimapNmax = 5, outFilterMismatchNmax = 3, alignIntronMin = 10, alignIntronMax = 50000 and alignMatesGapMax = 50000. As done for the genome assembly, gene annotation was evaluated using Benchmarking Universal Single-Copy Orthologue (BUSCO v3.0.2)<sup>29</sup> with a reference set of 1,658 proteins conserved in Insecta. Putative

functions of predicted proteins were assigned using blastp (v2.6.0) against GenBank NR (non-redundant GenBank CDS translations+PDB+SwissProt+PIR+PRF) release 09/2017, and interproscan v5.13-52.0 against Interpro. Associated GO terms were collected from blast NR and interproscan results with blast2GO (v2.5).

# **Annotation of OBPs, CSPs, ORs and IRs**

The annotation of genes encoding soluble transporters (OBPs and CSPs), odorant receptors (ORs) and ionotropic receptors (IRs) was performed using known sequences from other species with their genome sequenced (*S. frugiperda*, *S. litura*, *B. mori*, *H. melpomene* and *Danaus plexippus*)<sup>8,10,11,33,34</sup>. For each type of gene family, the set of known amino acid sequences and the genome sequence of *S. littoralis* were uploaded on the BIPAA galaxy platform to run the following annotation workflow. First, known amino acid sequences were used to search for *S. littoralis* scaffolds potentially containing genes of interest using tblastn<sup>35</sup>. All *S. littoralis* scaffolds with significant blast hits (e-value < 0.001) were retrieved to generate a subset of the genome. Amino acid sequences were then aligned to this subset of the genome using Scipio<sup>36</sup> and Exonerate<sup>37</sup> to define intron/exon boundaries and to create gene models. Outputs from Scipio and Exonerate were then visualized on a Apollo browser<sup>38</sup> available on the BIPAA platform. All gene models generated have been manually validated or corrected via Apollo, based on homology with other lepidopteran sequences and on RNAseq data available for *S. littoralis*<sup>20,22,39</sup>. The classification of deduced proteins and their integrity were verified using blastp against the non-redundant (NR) GenBank database. When genes were suspected to be split on different scaffolds, protein sequences were merged for further analyses. OBPs were also annotated in the *S. litura* genome, using a similar procedure. For OBPs and CSPs, SignalP-5.0<sup>40</sup> was used to determine the presence or absence of a signal peptide. Hereafter, the

abbreviations Slit, Slitu and Sfru (for *S. littoralis*, *S. litura* and *S. frugiperda*, respectively) are used before gene names to clarify the species.

## **Iterative annotation and re-annotation of gustatory receptors (GRs)**

The initial annotation of gustatory receptor genes was carried out the same way as for the other genes involved in chemosensation. Subsequent steps were then added to annotate the full repertoire of GRs. At the end of the manual curation, all the newly identified amino acid GR sequences were added to the set of known GR sequences to perform a new cycle of annotation. This iterative strategy was used for *S. littoralis* as well as for *S. litura* and *S. frugiperda* and was performed until no new GR sequence was identified.

At the end of the annotation, all GR amino acid sequences were aligned for each species individually using MAFFT v7.0<sup>41</sup> in order to identify and filter allelic sequences. Between alleles, only the longest sequence was retained for further analysis. Pseudogenes were identified as partial sequences containing one or multiple stop codons. Genes were considered complete when both following conditions were met: 1) a start and a stop codon were identified and 2) a sequence length >350 amino acids. *S. littoralis* gene names were attributed based on orthology relationships with *S. frugiperda* when possible. *S. frugiperda* newly identified genes compared to the previous publications were numbered starting from SfruGR232. *S. litura* newly identified gene names were numbered starting from SlituGR240.

## **Annotation and enrichment analysis of transposable elements around chemosensory receptor genes in *Spodoptera* species**

The annotation of transposable elements (TEs) in *S. littoralis* genome was performed using REPET (Galaxy Lite v2.5). The TEdenovo pipeline<sup>42</sup> was used to identify consensus sequences representative of each type of repetitive elements. Only contigs of a length >10 kb were used



as input for the pipeline. Consensus sequences were built only if at least 3 similar copies were detected in the genome. The TEannot pipeline<sup>43</sup> was then used to annotate all repetitive elements in the genome using the library of TE consensus and to build a non-redundant library in which redundant consensus were eliminated (length  $\geq 98\%$ , identity  $\geq 95\%$ ). The non-redundant library of TEs was finally used to perform the *S. littoralis* genome annotation with the TEannot pipeline.

The tool LOLA (Locus Overlap Analysis) within the R package Bioconductor<sup>44</sup> was used to test for enrichment of TEs within the genomic regions containing chemosensory receptor genes (ORs and GRs) in both *S. littoralis* and *frugiperda*. To run LOLA with data from *S. littoralis*, 3 datasets were created. The first dataset, the query set, contained genomic regions of 10 kb around each chemosensory receptor gene. Since these genes were mostly organized in clusters within the genome, this dataset of the genome led to the creation of 114 chemosensory regions for the GRs and 63 regions for the ORs. The second dataset, the region universe, contained 1000 random regions of similar sizes selected from the genome. The last dataset, the reference dataset, contained the coordinates of TEs previously identified by the REPET analysis. The enrichment in TE content within the chemosensory regions and the control regions were then compared using LOLA using a Fisher's Exact Test with false discovery rate correction to assess the significance of overlap in each pairwise comparison. The same method was used using *S. frugiperda* TEs, previously annotated using the same tool REPET<sup>5</sup>, as well as chemosensory receptor re-annotations from the present work and led to the creation of 191 chemosensory regions for the GRs and 88 regions for the ORs.

## Evolutionary analyses

### *Phylogenetic tree reconstructions*

Chemosensory-related protein trees were constructed for OBPs, CSPs, ORs, IRs and GRs. For GRs, the phylogeny was built using GR amino acid sequences from different Lepidoptera species with various diets. In order to take into account the whole repertoire of GRs in our analysis, only species in which the GRs were annotated following whole genome sequencing were considered. The data set contained GRs from polyphagous (*S. littoralis*, *S. litura*, *S. frugiperda*), oligophagous (*H. melpomene* – 73 GRs, *Manduca sexta* – 45 GRs) and monophagous species (*B. mori* -72 GRs). The multiple sequence alignment of all GR amino acid sequences was performed with ClustalO<sup>45</sup> and the phylogeny was reconstructed using PhyML 3.0<sup>46</sup> (<http://www.atgc-montpellier.fr/phyml/>) with the automatic selection of the best substitution model by SMS<sup>47</sup>. The resulting phylogenetic tree was edited using FigTree v1.4.2 (<https://github.com/rambaut/figtree>) and Inkscape 0.92 (<https://inkscape.org/fr/>). Branch supports were estimated using the approximate likelihood-ratio test (aLRT)<sup>48</sup> implemented at <http://www.atgc-montpellier.fr/phyml/>. For other gene families, sequences from various Lepidoptera species were retrieved and aligned with *S. littoralis* sequences using MAFFT<sup>41</sup>. The reconstruction of the phylogenetic trees was carried out the same way as for the GRs.

### **Tree reconciliation**

Estimates of gains and losses of GR genes across the Noctuidae were inferred using the reconciliation methods implemented in Notung v2.6<sup>49,50</sup>. The species tree was generated using TimeTree.org<sup>51</sup> and the gene tree was the reconstructed phylogeny of the GRs generated by PhyML.

### **Evolutionary pressures**

The codeml software of the package PAML was used to infer selective pressures<sup>52</sup>. Because of the high divergence between GRs across the phylogeny, selective pressures were inferred on 13 subtrees extracted from the GR phylogeny in order to minimize the ratio of synonymous

substitutions. For each subtree, a codon alignment was performed using protein sequence alignments performed using MAFFT and PAL2NAL<sup>53</sup> in order to convert the amino acid alignment to a codon alignment, and a phylogenetic tree was reconstructed based on this alignment. Sequences introducing large gaps in the alignment were removed in order to compute codeml on the largest alignment possible. To estimate the selective pressures acting on the evolution of the lepidopteran GR genes, the “m0 model” from codeml of the PAML package was computed on the 13 subtrees to estimate the global  $\omega$  (ratio of non-synonymous substitutions dN/ratio of synonymous substitutions dS)<sup>54</sup>. The  $\omega$  value reflects the mode of evolution, with  $\omega > 1$  indicating positive selection,  $\omega < 1$  indicating purifying selection and  $\omega = 1$  indicating neutral evolution. To further infer positive selection, two comparisons between evolutionary models were conducted. First, the comparison between M8 and M8a models can detect positive selection acting on sites, i.e. columns of the alignment<sup>55,56</sup>. This comparison was conducted only when the global  $\omega$  calculated from the m0 model was  $> 0.3$ . The second comparison between branch-site model A and its neutral counterpart can detect positive selection acting on particular sites on a specific lineage<sup>57</sup>. Here, we tested all the terminal branches of the trees for which both the global  $\omega$  was elevated and the comparison between models M8 and M8a statistically significant. Since many branches were tested for each tree, a correction for multiple testing to control for false discovery rate was applied: the q-value (Storey and al, R package version 2.22.0)<sup>58</sup>. In the case of a statistically significant q-value ( $< 0.05$ ), positively selected sites were inspected for possible artifacts due to partial sequences or misalignment.

### ***Putative functional assignation***

In order to assign putative functions to several candidate SlitGRs, both their phylogenetic position and theoretical 3D structure were analyzed. For the theoretical structures, the

257 AlphaFold algorithm<sup>59</sup> was used to model candidate SlitGRs as well as their *B. mori* ortholog  
 258 GRs with known function: BmorGR9 and BmorGR66. Structures were then compared between  
 259 orthologs using the MatchMaker tool of Chimera and the RMSD (Root Mean Square Deviation)  
 260 computed using the same tool<sup>60</sup>.

## Results and discussion

### Genome assembly and automatic annotation of the *Spodoptera littoralis* genome

The first assembly of *S. littoralis* (v1.0), obtained with short Illumina reads, contained 123,499 scaffolds with a N50 of 18 kb and an assembly total size around 470 Mb. The second assembly (v2.0), obtained with a combination of both short Illumina and long PacBio reads, contained 28,891 scaffolds, with a N50 of 64 kb and an assembly total size around 465 Mb (Table 1). The genome size of *S. littoralis* was in good correlation with flow cytometry evaluation (470 Mb). The BUSCO analysis revealed that the second assembly contained more than 95% of complete BUSCO genes, with almost 94% being present in single-copy (Table 2). This second assembly was then used as the final assembly in all the following analyses. A total of 35,801 genes were predicted using BRAKER (OGS3.0\_20171108). The BUSCO analysis indicated that almost 97% of BUSCO proteins were complete, with more than 88% being present in single-copy (Table 2). These data showed the good quality of the *S. littoralis* genome assembly, thus allowing for accurate comparison with other *Spodoptera* genomes.

### OBP, CSP, OR and IR chemosensory gene repertoires were of comparable size among *Spodoptera* spp.

To have a full view of the *S. littoralis* chemosensory equipment, we manually curated all the major chemosensory-related gene families, including soluble carrier proteins (OBPs and CSPs), proposed to facilitate chemical transfer to chemosensory receptors<sup>23</sup>, and the membrane bound receptors (ORs: seven transmembrane proteins expressed in the membrane of olfactory sensory neurons, GRs: seven transmembrane proteins hosted by taste neurons, and IRs: three transmembrane proteins sensing acids and amines<sup>61–63</sup>). The genome of *S. littoralis* contained 23 CSP genes, all of them encoding full-length sequences with a signal peptide. This number of genes is similar to the 22 CSP genes annotated in *S.*

*frugiperda*<sup>33</sup> and the 23 CSP genes annotated in *S. litura*<sup>8</sup>. Among all these sequences, 16 CSP genes are 1:1 orthologs between the three *Spodoptera* species included in the tree while 11 CSP genes are 1:1 orthologs with BmorCSPs (from *B. mori*), showing the high level of conservation in this gene family (Supp data 2 Figure S1).

We also annotated 53 OBP genes in *S. littoralis*. Among these genes, 49 were complete and 48 possessed a signal peptide (Supp data 2). The phylogenetic tree revealed a clade enriched in *Spodoptera* OBPs (9 SlitOBPs, 9 SlituOBPs and 10 SfruOBPs) (Figure S2). This expansion probably arose from recent tandem duplications as most of the genes of the expansion are organized in synteny in the three species (Figure S3).

We annotated 44 IR genes in the *S. littoralis* genome, 43 of which encoding a full-length sequence with various sizes containing 547 to 948 amino acids (AAs) (Supp data 2). In addition to the two conserved co-receptors IR8a and IR25a<sup>64</sup>, we identified 18 candidate antennal IRs putatively involved in odorant detection, 23 divergent IRs putatively involved in taste and 12 ionotropic glutamate receptors (iGluRs). The total IR number was similar to the 44 IR genes annotated in *S. litura*<sup>65</sup> and the 43 IR genes annotated in *S. frugiperda*<sup>5</sup>. Among all these sequences, 43 IR genes are 1:1 orthologs between the three *Spodoptera* species (IR100g was missing in *S. frugiperda*). The phylogenetic tree revealed a clade containing divergent IRs and two lineage expansions were observed (IR7d and IR100), likely attributed to gene duplications<sup>65</sup>. The number of divergent IRs was much higher in *Spodoptera* species (*S. littoralis*: 26, *S. litura*: 26, *S. frugiperda*: 25) than in *H. melpomene* (16) and *B. mori* (6). By contrast, phylogenetic analysis (Figure S4) reveals that *S. littoralis* antennal IRs retained a single copy within each orthologous group.

We annotated 73 OR genes in the *S. littoralis* genome scattered among 61 scaffolds (Supp data 2), including the obligatory co-receptor ORco (ref Jones et al 2005 Curr Biol). The number of OR genes in the *S. littoralis* repertoire was similar to the repertoire of closely related species

(69 in *S. frugiperda*, 73 in *S. litura*) and other Lepidoptera (64 in *D. plexippus*, 73 in *M. sexta*).  
The phylogenetic tree of ORs is presented in Figure S5.  
Altogether, our annotations revealed that OBP, CSP, OR and IR repertoires were of comparable  
size among the *Spodoptera spp* investigated.

### **A highly dynamic evolution of the GR multigene family in *Spodoptera* species**

Newly obtained genomes of polyphagous noctuidae species such as *H. armigera*<sup>66</sup>, *S. litura*<sup>6</sup>,  
*S. frugiperda*<sup>5</sup> and *Agrotis ipsilon*<sup>67</sup> revealed an important expansion of gustatory receptors in  
these species, suggesting an adaptation mechanism to polyphagy. Here, using these known GR  
protein sequences and an iterative annotation process, we annotated an even larger repertoire  
of GRs in the *S. littoralis* genome. In view of these data, we searched for possible missing GRs  
in the *S. frugiperda* and *S. litura* genomes to complete their GR repertoires (Table 3). We  
annotated a total of 376 GR genes scattered on 110 scaffolds in the genome of *S. littoralis*, and  
reannotated 417 GRs on 196 scaffolds in the *S. frugiperda* genome and 293 GRs on 30 scaffolds  
in *S. litura* (Supp data 3). Our GR analysis not only revealed that the full repertoire of *S.*  
*littoralis* GRs is in fact much more important than previously reported, but also that the GR  
numbers in *S. litura* and *S. frugiperda* have been under evaluated (although the presence of  
some alleles may over evaluate these numbers). Among these sequences, several were indeed  
allelic version of previously annotated genes but several new genes were also identified (Table  
3). Among these genes, the percentage of complete genes varied between species, from only  
41% in *S. frugiperda* compared to 79% in *S. litura* while the percentage of complete GRs in *S.*  
*littoralis* was intermediate (73%). The percentage of allelic sequences were also highly variable,  
probably depending on the heterozygosity level of each considered genome. Indeed, the highest  
number of alleles was reached in *S. frugiperda*, a genome with a high level of heterozygosity<sup>33</sup>,  
while alleles were less frequent in the two other *Spodoptera* genomes considered. When  
omitting pseudogenes and alleles, the final repertoires of GRs are composed of 325 genes in *S.*

*littoralis*, 274 GRs in *S. frugiperda* and 280 GRs in *S. litura*. As previously shown, multiple clusters of GRs were also found in the *S. littoralis* genome. The two main clusters were found on scaffolds 1414 and 878 that contained each 27 GR genes. The phylogeny reconstructed using the GR sequences from the three *Spodoptera* species as well as those from *B. mori* (BmorGRs) and *H. melpomene* (HmelGRs) showed that a few *Spodoptera* GRs clustered with candidate CO<sub>2</sub>, sucrose and fructose receptors, while the majority of the *Spodoptera* GRs were part of the so-called bitter receptor clades. Among the candidate bitter receptor clades, eleven clades were enriched in *Spodoptera* genes (numbered from A to K in Figure 1) and encompassed the majority of the three *Spodoptera* GR repertoires (Table 4). When belonging to the same phylogenetic clade, GRs from the same species tend to be located on the same scaffold, supporting the theory of the expansion of these genes by tandem duplications and few gene losses. For the subsequent analysis, only complete and partial genes were considered while pseudogenes were discarded. Four *S. littoralis* GRs with only one exon were identified, clustered on scaffold 67 and belonging to the same phylogenetic clade (Figure 1). Interestingly, this clade was very conserved with a 1:1 orthology relationship between the three *Spodoptera* species, the SlituGRs and SfruGRs being also monoexonic. All these monoexonic genes are orthologs with BmorGR53, a single exon gene that is highly expressed at the larval stage but not in the adult<sup>11</sup>. BmorGR53 is able to detect the bitter tastant and feeding deterrent coumarine<sup>68</sup>. It is then likely that these 4 single exon GRs play an important role in host-plant recognition in *Spodoptera* species as well.

The GR phylogeny served as a basis for the reconciliation of the gene- and species-tree in order to estimate gene gains and losses. The Notung analysis revealed that the ancestral repertoire of GRs of Noctuidae species contained 58 genes (Figure 2). Given the numbers of GRs annotated in *Spodoptera* species, it is not surprising that the highest gene gains occurred in the ancestor of *Spodoptera* species (296 gene gains). However, even for species with a smaller repertoire of



genes such as *B. mori* (70 GRs) and *H. melpomene* (73 GRs), the turnover of genes compared to the ancestors is important (33 and 41 gene gains, 25 and 26 gene losses, respectively).

### **Annotation of transposable elements, enrichment analysis and selection pressure**

To get more insights about the mechanisms that led to the formation of massive genomic clusters of GR genes, we looked at 1) whether TEs could be involved and 2) the selective pressures acting on GR genes.

TEs have been shown to be involved in countless mechanisms of evolution in insects, such as insecticide resistance, the evolution of regulatory networks, immunity, climate adaptation<sup>16,69–74</sup> and some of them have even been domesticated as genes<sup>75</sup>. Gene families involved in these traits have been shown to be enriched in TEs and gene family expansions have been correlated with TE content, for instance in termites<sup>76</sup>. Interestingly, enrichment in TEs has not been reported for insect GR gene clusters so far. While annotating GRs in the *S. littoralis* genome, we noticed the frequent co-occurrence of TEs on the same scaffolds. We thus annotated TEs in the *S. littoralis* genome and calculated their enrichment in the vicinity of GR genes. We also carried out the same enrichment analysis in *S. frugiperda* genomes, as TE annotation in this last species has been done using the same REPET pipeline as in our study. The *de novo* constructed library contained 1089 consensus sequences of TEs and was used to annotate the *S. littoralis* genome. The repeat coverage for the *S. littoralis* genome was 30.22%, representing 140 Mb, which is similar to that of *S. frugiperda* (29.10%), *S. litura* (31.8%) and *S. exigua* (33.12%)<sup>5,6,77</sup>. The relative contribution of the different classes of repetitive elements revealed that Class I elements were more represented than Class II elements (66.96% vs 20.83%), a classical feature of insect genomes<sup>75</sup> (Figure 3, Table 5). However, the repartition and proportions between the different classes differed between these species. The Class I SINE was the most represented in *S. frugiperda* (12.52%)<sup>33</sup> and one of them was found to be enriched in the vicinity of the GRs

in both *S. littoralis* and *S. frugiperda* while the class I LINE elements were the most represented in both *S. litura* and *S. exigua*, although with a lower proportion of all repeated elements (27.73% and 14.81%, respectively). Remarkably, the proportion of LINE elements identified in the *S. littoralis* genome was the highest reported so far in arthropods<sup>78</sup>, accounting for 52.18% of all repetitive elements. In two subspecies of the Asian gypsy moth *Lymantria dispar*, the accumulation of this particular class of transposable elements was found to be responsible for their large genome size<sup>79</sup>, a phenomenon also observed in other insect species<sup>75</sup>. The accumulation of the same elements in the *S. littoralis* genome could explain its larger size compared to its *Spodoptera* counterparts (470Mb vs ~400Mb for *S. frugiperda*, 438Mb for *S. litura*, 408-448Mb for *S. exigua*). The second most represented was DNA transposons, Class II TIR elements, representing 11.04% of all TEs (Figure 3, Table 5).

The enrichment of TEs in the vicinity of GR gene clusters was tested in both *Spodoptera littoralis* and *frugiperda*, and we found that a particular category of class I retrotransposons, a SINE transposon, was significantly enriched (q-value < 0.005) in the vicinity of the GRs in both species (q-value = 0.0043 and 0.0078, respectively), suggesting a transposon-mediated mechanism for the formation of GR clusters (Supp data 4). SINE elements are typically small (80-500 bp) and originate from accidental retrotransposition of various polymerase III transcripts. These elements are non-autonomous, therefore their involvement in the dynamic of the GR multigene family may be related to their potential to induce genome rearrangements via unequal crossing over, hence potential drivers of duplication, as previously shown in other insect species<sup>80-83</sup>. Given their prevalence in the *S. littoralis* genome, the potential role of these TEs in the GR family dynamic is probably just one of their numerous functions. The same enrichment analysis performed for the OR loci showed no significant enrichment in *S. littoralis* but did show enrichment in an uncharacterized class of transposons in the vicinity of SfruORs (Supp data 4).

Several studies have shown the importance of positive selection in the evolution of multigene families, especially in chemosensory genes such as ORs and GRs<sup>84,85</sup>. Positively selected chemoreceptors may be linked to adaptation in *Drosophila* species<sup>86,87</sup>. In the pea aphid, signatures of selection have been identified in chemosensory genes, including GRs and ORs, which may be implicated in the divergence of pea aphid host races<sup>88–90</sup>. We thus analyzed selective pressures focusing on 13 clades of interest in the *Spodoptera* GR phylogeny: the potential clade of CO<sub>2</sub> receptors, the potential clade of sugar receptors and the 11 expended lineages within the so-called bitter receptor clades. For all 13 clades, we observed low global  $\omega$  values ranging from 0.01 to 0.42, with the highest observed for candidate bitter receptor clades. The comparison between models M8 and M8a was statistically significant for clades C, F and J, indicating a signal of positive selection. Branch-site models on terminal branches of the associated trees were then tested on these clades. For clade J, no GR was revealed as evolving under positive selection. However, for clades C and F, 2 and 5 GRs were identified as positively selected, respectively (Table 6). Within these GR sequences, very few positively selected sites were identified for each gene (between 0 and 3, Supp data 5). This finding is coherent with previous studies showing the same pattern of evolutionary rates<sup>91,92</sup>, especially in *S. frugiperda*<sup>5</sup> (3 GRs under positive selection when comparing two host strains). Taken together, all positive selection analyses indicate that positive selection within the GR gene family is cryptic and may not play an important role in shaping the evolution of *Spodoptera* GRs. Anyhow, the few positively selected GRs may be interesting candidates for further functional studies.

#### **Putative functional assignation of candidate SlitGRs**

435 The complexity of the evolution of the bitter GRs is reflected by their complex functioning.  
 436 Indeed, in contrast with the relatively simple OR/Orco association that is the basis for olfaction,  
 437 the molecular basis for gustation is marked by several characteristics that were recently  
 438 identified in *D. melanogaster*. First, some GRs have to be co-expressed within the same neuron  
 439 in order to be able to respond to a stimulus. Second, it seems that GR-GR inhibition can  
 440 modulate neuron responses<sup>93</sup>. The challenge in the next few years will be to characterize both  
 441 the response spectra and precise expression patterns of GRs of interest. However, those GRs of  
 442 interest need to be selected. The present work provides us with some valuable candidates such  
 443 as the single exon GRs for which the function is known in *B. mori*. Also, it seems that individual  
 444 GRs can play an important role in the ecology of a species. Among examples are BmorGR9,  
 445 which binds D-fructose without the need of any other GR<sup>94,95</sup>, and BmorGR66, whose silencing  
 446 confers to the monophagous *B. mori* larva the ability to feed from different food sources<sup>96</sup>. We  
 447 identified their *S. littoralis* orthologs as SlitGR9 and SlitGR15, respectively. We predicted their  
 448 3D structures using AlphaFold and compared them to the AlphaFold predicted structures of *B.*  
 449 *mori* orthologues. The RMSD computed between the whole 3D structures of BmorGR9 and  
 450 SlitGR9 was 10.855Å (Figure 4A), but when the N-terminal end, as well as the loop between  
 451 the transmembrane domains 4 and 5, were removed (regions that were disordered and difficult  
 452 to predict), the RMSD improved to 1.170Å (Figure 4B). Both structures were strikingly similar  
 453 on their extracellular side, suggesting that SlitGR9 is likely a D-fructose receptor in *S. littoralis*.  
 454 The ligand of BmorGR66 is not known, however, this receptor is responsible for the feeding  
 455 difference of *B. mori* for mulberry leaves<sup>96</sup>. Its ortholog SlitGR15 is a key candidate for  
 456 functional studies to test if this GR has an impact on the feeding preference in *S. littoralis* as  
 457 well. When comparing both full structures, the RMSD was 6.518Å (Figure 4C) while it  
 458 decreased to 3.599Å when the N-terminal of both structures were removed from the analysis

(Figure 4D). Interestingly, differences were visible between both structures in the extracellular domains of the proteins, suggesting that the binding pockets may differ as well.

Apart from these particular GRs, the neuronal coding of taste via more than 200 genes in species like *Spodoptera* moths is not known. But are all these GRs at play in effective taste sense? In fact, comparison of GR gene repertoires with transcript repertoires showed that a small proportion of the gene repertoire is actually expressed in the canonical gustatory tissues of *Spodoptera spp.*, as can be seen in *S. littoralis* and *S. litura*<sup>8,20,21</sup>. In addition, GR expression levels - especially that of bitter receptors - are rather low. Whether the genome acts as a “reservoir” for a multitude of GR genes to be selectively expressed in accordance with the evolution of food preference remains to be investigated. In that view, the identification of regulatory genomic regions and transcription factors in the vicinity of GR regions that may be at play in GR expression choice would help understanding if and how GRs evolved according to polyphagy.

## Tables

**Table 1. Statistics of the *S. littoralis* genome assemblies.**

|                                | Slit genome v1.0 | Slit genome v2.0 |
|--------------------------------|------------------|------------------|
| <b>Number of scaffolds</b>     | 123499           | 28891            |
| <b>Total size of scaffolds</b> | 470 Mb           | 465 Mb           |
| <b>Longest scaffold</b>        | 236 kb           | 816 kb           |
| <b>N50 scaffold length</b>     | 18 kb            | 64 kb            |
| <b>scaffold %N</b>             | 0.41             | 0.92             |

**Table 2. BUSCO statistics on *S. littoralis* genome and annotation.**

|                                            | Slit genome v2.0 | Annotation<br>BRAKER OGS3.0 |
|--------------------------------------------|------------------|-----------------------------|
| <b>Complete BUSCOs (C)</b>                 | 1584 (95.5%)     | 1603 (96.68%)               |
| <b>Complete and single-copy BUSCOs (S)</b> | 1558 (94%)       | 1467 (88.48%)               |
| <b>Complete and duplicated BUSCOs (D)</b>  | 26 (1.6%)        | 136 (8.2%)                  |
| <b>Fragmented BUSCOs (F)</b>               | 45 (2.7%)        | 48 (2.89%)                  |
| <b>Missing BUSCOs (M)</b>                  | 29 (1.7%)        | 7 (0.42%)                   |
| <b>Total BUSCO groups searched</b>         | 1658             | 1658                        |

**Table 3. GR repertoires of *Spodoptera* species.**

|                                                  | <i>S. littoralis</i> | <i>S. frugiperda</i> | <i>S. litura</i> |
|--------------------------------------------------|----------------------|----------------------|------------------|
| <b>Number of GR<br/>previously<br/>annotated</b> | 38                   | 231                  | 237              |

|                           |           |           |           |
|---------------------------|-----------|-----------|-----------|
| <b>Complete genes</b>     | 275 (73%) | 172 (41%) | 231 (79%) |
| <b>Partial genes</b>      | 50 (13%)  | 106 (25%) | 49 (17%)  |
| <b>Pseudogenes</b>        | 19 (5%)   | 22 (5%)   | 7 (2%)    |
| <b>Alleles</b>            | 29 (8%)   | 117 (28%) | 6 (2%)    |
| <b>Total in this work</b> | 373       | 417       | 293       |

479  
480 **Table 4. Number of *Spodoptera* GRs by expansion clade.** The percentages represent the  
481 proportion of *Spodoptera* genes to the total number of GRs annotated in the three *Spodoptera*  
482 species (complete + partial genes indicated in Table 3).

| <b>Clade</b> | <b><i>S. littoralis</i></b> | <b><i>S. frugiperda</i></b> | <b><i>S. litura</i></b> |
|--------------|-----------------------------|-----------------------------|-------------------------|
| <b>A</b>     | 20                          | 15                          | 14                      |
| <b>B</b>     | 65                          | 42                          | 44                      |
| <b>C</b>     | 40                          | 40                          | 33                      |
| <b>D</b>     | 97                          | 74                          | 89                      |
| <b>E</b>     | 7                           | 3                           | 4                       |
| <b>F</b>     | 12                          | 10                          | 11                      |
| <b>G</b>     | 10                          | 8                           | 10                      |
| <b>H</b>     | 16                          | 11                          | 16                      |
| <b>I</b>     | 7                           | 8                           | 7                       |
| <b>J</b>     | 16                          | 21                          | 18                      |
| <b>K</b>     | 4                           | 6                           | 5                       |
| <b>Total</b> | 294 (90.5%)                 | 238 (86.9%)                 | 251 (89,6%)             |

**Table 5. Repartition of repetitive elements in *S. littoralis* genome based on the classification established by Wicker et al.<sup>97</sup>. noCat means repetitive elements that could not be classified into the existing categories.**

|                          | TE category         | % of coverage of all repetitive elements |
|--------------------------|---------------------|------------------------------------------|
| Class I Retrotransposons | DIRS                | 0.20%                                    |
|                          | LARD                | 0.19%                                    |
|                          | <b>LINE</b>         | <b>52.18%</b>                            |
|                          | LTR                 | 3.02%                                    |
|                          | PLE                 | 1.12%                                    |
|                          | SINE                | 9.33%                                    |
|                          | TRIM                | 0.92%                                    |
| Class II DNA transposons | Helitron            | 5.17%                                    |
|                          | MITE                | 3.90%                                    |
|                          | Maverick            | 0.01%                                    |
|                          | <b>TIR</b>          | <b>11.04%</b>                            |
|                          | Class II noCat      | 0.71%                                    |
| Others                   | noCat               | 11.87%                                   |
|                          | Potential Host Gene | 0.35%                                    |

**Table 6. Selective pressure analysis. NS: non significant, /: not calculated.**

| Clade    | # of sequences | $\omega$ M0 ( $d_N/d_S$ ) | p-value (M8 vs M8a) | branch-site |
|----------|----------------|---------------------------|---------------------|-------------|
| <b>A</b> | 45             | 0.34109                   | NS                  | /           |



|              |     |         |            |                                    |
|--------------|-----|---------|------------|------------------------------------|
| <b>B</b>     | 133 | 0.34146 | NS         | /                                  |
| <b>C</b>     | 86  | 0.34386 | 0.044804*  | Slit_GR217, Slitu_GR155            |
| <b>D</b>     | 218 | 0.29174 | /          |                                    |
| <b>E</b>     | 14  | 0.18639 | /          | /                                  |
| <b>F</b>     | 33  | 0.41616 | 0.000504** | Sfru_GR44, Sfru_GR49,<br>Slit_GR44 |
| <b>G</b>     | 28  | 0.36571 | NS         | /                                  |
| <b>H</b>     | 38  | 0.31933 | NS         | /                                  |
| <b>I</b>     | 16  | 0.22375 | /          | /                                  |
| <b>J</b>     | 38  | 0.42257 | 0.005319** | NS                                 |
| <b>K</b>     | 11  | 0.17393 | /          | /                                  |
| <b>Sugar</b> | 27  | 0.05662 | /          | /                                  |
| <b>CO2</b>   | 11  | 0.01074 | /          | /                                  |

489

## Figure legends

### Figure 1 Phylogeny of lepidopteran GRs

The dataset included amino acid sequences from *S. littoralis* (Noctuoidea, red), *S. litura* (Noctuoidea, green), *S. frugiperda* (Noctuoidea, orange), *B. mori* (Bombycoidea, blue) and *H. melpomene* (Papilionoidea, cyan). Sequences were aligned using ClustalO and the phylogenetic tree was reconstructed using PHYML. CO<sub>2</sub> receptor candidates as well as sugar receptor candidates are indicated in blue and yellow, respectively. All the other GRs are part of the bitter receptor clades. The star indicates the clade of single-exon GRs. Midpoint rooting was used. Circles indicate nodes strongly supported by the likelihood-ratio test (aLRT>0.9). The scale bar represents 0.5 amino acid substitutions per site.

### Figure 2 GR gain and loss estimates across lepidopterans

The gene-tree of GRs generated using PhyML was reconciled with the species-tree using Notung<sup>50</sup> to estimate gene gains and losses. Numbers in boxes represent the size of GR repertoire for extant species as well as ancestors at the nodes of the species tree. Gene gains are indicated in red while gene losses are indicated in green. The expansion that occurred in the ancestor of *Spodoptera* species is indicated in red on a black background.

### Figure 3 Repartition and size of repeat content in *S. littoralis* genome

Repetitive elements account for 30.22% of *S.littoralis* genome. Class I elements are more abundant than class II. The class I LINE elements represent more than half of all repetitive elements.

### Figure 4 3D structures of BmorGR9 and BmorGR66 and their respective orthologs, SlitGR9 and SlitGR15

515 3D structures were predicted using AlphaFold2<sup>59</sup>. **A** and **C**. Alignment of full 3D structures. In  
 516 **B** and **D**, the disordered regions such as the large extracellular loops (**B**) and the N-terminal  
 517 ends (**B** and **D**) were removed for the comparison of the orthologs' structures.

## Supplementary figures

### Figure S1 Phylogeny of lepidopteran CSPs

The dataset included amino acid sequences from *S. littoralis* (Noctuoidea, red), *S. litura* (Noctuoidea, green), *S. frugiperda* (Noctuoidea, orange), *B. mori* (Bombycoidea, blue) and *H. melpomene* (Papilionoidea, cyan). Sequences were aligned using MAFFT and the phylogenetic tree was reconstructed using PhyML. Midpoint rooting was used. Circles indicate nodes strongly supported by the likelihood-ratio test (aLRT>0.9). The scale bar represents 0.5 amino acid substitutions per site.

### Figure S2 Phylogeny of lepidopteran OBPs

The dataset included 53 amino acid sequences from *S. littoralis* (Noctuoidea, red), 53 sequences from *S. litura* (Noctuoidea, green), 53 sequences from *S. frugiperda* (Noctuoidea, orange), 44 sequences from *B. mori* (Bombycoidea, blue) and 43 sequences from *H. melpomene* (Papilionoidea, cyan). Sequences were aligned using MAFFT and the phylogenetic tree was reconstructed using PhyML. Subfamilies are indicated with different colors (yellow: Minus C subfamily, green: Plus-C subfamily, blue: PBP-GOBP subfamily). Midpoint rooting was used. Circles indicate nodes strongly supported by the likelihood-ratio test (aLRT>0.9). The red star indicates expansion in *Spodoptera*. The scale bar represents 0.5 amino acid substitutions per site.

**Figure S3 Genomic organization of the *Spodoptera* OBP genes.** Scaffolds/chromosomes are represented in gray, with their numbers in italic. Gene names are indicated and their orientations are represented by the arrows.

### Figure S4 Phylogeny of lepidopteran IRs

The dataset included amino acid sequences from *S. littoralis* (Noctuoidea, red), *S. litura* (Noctuoidea, green), *S. frugiperda* (Noctuoidea, orange), *B. mori* (Bombycoidea, blue) and *H. melpomene* (Papilionoidea, cyan). Sequences were aligned using MAFFT and the phylogenetic tree was reconstructed using PHYML. Colors indicate different categories of IRs (yellow: divergent IRs, grey: ionotropic glutamate receptors, orange: IR25a coreceptors). The tree was rooted using the iGluR clade. Circles indicate basal nodes strongly supported by the likelihood-ratio test (aLRT>0.9). The scale bar represents 0.5 amino acid substitutions per site.

### Figure S5 Phylogeny of lepidopteran ORs

The dataset included amino acid sequences from *S. littoralis* (Noctuoidea, red), *S. litura* (Noctuoidea, green), *S. frugiperda* (Noctuoidea, orange), *B. mori* (Bombycoidea, blue) and *H. melpomene* (Papilionoidea, cyan). Sequences were aligned using MAFFT and the phylogenetic tree was reconstructed using PHYML. The tree was rooted using the Orco clade (purple). Circles indicate basal nodes strongly supported by the likelihood-ratio test (aLRT>0.9). The scale bar represents 0.5 amino acid substitutions per site.

### Data Availability Statement

The assembled genome of *Spodoptera littoralis* as well as the genomic data of *Spodoptera litura* (v1.0)<sup>8</sup> and *Spodoptera frugiperda* (Corn variant, v3.1)<sup>33</sup> are all publicly available on the BIPAA platform (<https://bipaa.genouest.org>) and on NCBI (XXXX).

### Acknowledgments

The *S. littoralis* genome has been sequenced in the framework of the i5K initiative (<http://i5k.github.io/>) and the InsectGenomes project at INRAE led by Denis Tagu (IGEPP).

568

## 569 ***Conflict of Interest***

570 The authors declare that there is no conflict of interest

571

## 572 ***Funder Information***

573 This work has been funded by INRAE (France), the French National Research Agency (ANR-  
574 16-CE21-0002-01, and ANR-16-CE02-0003) and by the European Union's Horizon 2020  
575 research and innovation program under the Marie Skłodowska-Curie grant agreement no.  
576 764840 for the ITN IGNITE project.

577

## 578 **Literature Cited**

- 579 1. Hong W, Zhao H. Vampire bats exhibit evolutionary reduction of bitter taste receptor genes  
580 common to other bats. *Proceedings of the Royal Society B: Biological Sciences*. 2014  
581 [accessed 2021 Nov 19];281(1788).  
582 <https://royalsocietypublishing.org/doi/abs/10.1098/rspb.2014.1079>.  
583 doi:10.1098/RSPB.2014.1079
- 584 2. Kirkness EF, Haas BJ, Sun W, Braig HR, Perotti MA, Clark JM, Lee SH, Robertson HM,  
585 Kennedy RC, Elhaik E, et al. Genome sequences of the human body louse and its primary  
586 endosymbiont provide insights into the permanent parasitic lifestyle. *Proceedings of the*  
587 *National Academy of Sciences of the United States of America*. 2010 [accessed 2018 Jul  
588 20];107(27):12168–73. <http://www.ncbi.nlm.nih.gov/pubmed/20566863>.  
589 doi:10.1073/pnas.1003379107
- 590 3. Xiao JH, Yue Z, Jia LY, Yang XH, Niu LH, Wang Z, Zhang P, Sun BF, He SM, Li Z, et al.  
591 Obligate mutualism within a host drives the extreme specialization of a fig wasp genome.  
592 *Genome biology*. 2013 [accessed 2021 Nov 19];14(12).

593 <https://pubmed.ncbi.nlm.nih.gov/24359812/>. doi:10.1186/GB-2013-14-12-R141

594 4. Li S, Zhu S, Jia Q, Yuan D, Ren C, Li K, Liu S, Cui Y, Zhao H, Cao Y, et al. The genomic  
595 and functional landscapes of developmental plasticity in the American cockroach. *Nature*  
596 *Communications*. 2018 [accessed 2018 Mar 27];9(1):1008.  
597 <http://www.nature.com/articles/s41467-018-03281-1>. doi:10.1038/s41467-018-03281-1

598 5. Gouin A, Bretaudeau A, Nam K, Gimenez S, Aury J-M, Duvic B, Hilliou F, Durand N,  
599 Montagné N, Darboux I, et al. Two genomes of highly polyphagous lepidopteran pests  
600 (*Spodoptera frugiperda*, Noctuidae) with different host-plant ranges. *Scientific Reports*. 2017  
601 [accessed 2017 Oct 2];7(1):11816. <http://www.nature.com/articles/s41598-017-10461-4>.  
602 doi:10.1038/s41598-017-10461-4

603 6. Cheng T, Wu J, Wu Y, Chilukuri R V., Huang L, Yamamoto K, Feng L, Li W, Chen Z,  
604 Guo H, et al. Genomic adaptation to polyphagy and insecticides in a major East Asian noctuid  
605 pest. *Nature Ecology and Evolution*. 2017;1(11):1747–1756.  
606 <http://dx.doi.org/10.1038/s41559-017-0314-4>. doi:10.1038/s41559-017-0314-4

607 7. Xu W, Papanicolaou A, Zhang H-J, Anderson A. Expansion of a bitter taste receptor family  
608 in a polyphagous insect herbivore. *Scientific Reports*. 2016;6:23666.  
609 <http://www.nature.com/articles/srep23666>. doi:10.1038/srep23666

610 8. Cheng T, Wu J, Wu Y, Chilukuri R V., Huang L, Yamamoto K, Feng L, Li W, Chen Z,  
611 Guo H, et al. Genomic adaptation to polyphagy and insecticides in a major East Asian noctuid  
612 pest. *Nature Ecology & Evolution*. 2017;1(November).  
613 <http://www.nature.com/articles/s41559-017-0314-4>. doi:10.1038/s41559-017-0314-4

614 9. The International Silkworm Genome Consortium. The genome of a lepidopteran model  
615 insect, the silkworm *Bombyx mori*. *Insect Biochemistry and Molecular Biology*.  
616 2008;38(12):1036–1045.  
617 <https://www.sciencedirect.com/science/article/pii/S0965174808002099>.

doi:<https://doi.org/10.1016/j.ibmb.2008.11.004>

10. Briscoe AD, Macias-Muñoz A, Kozak KM, Walters JR, Yuan F, Jamie GA, Martin SH, Dasmahapatra KK, Ferguson LC, Mallet J, et al. Female Behaviour Drives Expression and Evolution of Gustatory Receptors in Butterflies. *PLoS Genetics*. 2013;9(7). doi:10.1371/journal.pgen.1003620

11. Guo H, Cheng T, Chen Z, Jiang L, Guo Y, Liu J, Li S, Tanai K, Asaoka K, Kadono-Okuda K, et al. Expression map of a complete set of gustatory receptor genes in chemosensory organs of *Bombyx mori*. *Insect Biochemistry and Molecular Biology*. 2017. doi:10.1016/j.ibmb.2017.02.001

12. Consortium THG. Butterfly genome reveals promiscuous exchange of mimicry adaptations among species. *Nature*. 2012;487(7405):94–98. internal-pdf://228.60.152.105/2012-Butterfly genome reveals promiscuous exch.pdf. doi:10.1038/nature11041

13. Suzuki HC, Ozaki K, Makino T, Uchiyama H, Yajima S, Kawata M. Evolution of gustatory receptor gene family provides insights into adaptation to diverse host plants in nymphalid butterflies. *Genome Biology and Evolution*. 2018 May 18 [accessed 2018 May 18]. <https://academic.oup.com/gbe/advance-article/doi/10.1093/gbe/evy093/4999382>. doi:10.1093/gbe/evy093

14. Almeida FC, Sánchez-Gracia A, Campos JL, Rozas J. Family Size Evolution in *Drosophila* Chemosensory Gene Families: A Comparative Analysis with a Critical Appraisal of Methods. *Genome Biology and Evolution*. 2014 [accessed 2018 Jan 8];6(7):1669–1682. <https://academic.oup.com/gbe/article-lookup/doi/10.1093/gbe/evu130>. doi:10.1093/gbe/evu130

15. Nei M, Rooney AP. Concerted and Birth-and-Death Evolution of Multigene Families. *Annual Review of Genetics*. 2005;39(1):121–152.



doi:10.1146/annurev.genet.39.073003.112240

16. Bourque G, Burns KH, Gehring M, Gorbunova V, Seluanov A, Hammell M, Imbeault M, Izsvák Z, Levin HL, Macfarlan TS, et al. Ten things you should know about transposable elements. *Genome biology*. 2018;19(1):199. doi:10.1186/s13059-018-1577-z

17. Fiston-Lavier AS, Anxolabehere D, Quesneville H. A model of segmental duplication formation in *Drosophila melanogaster*. *Genome Research*. 2007;17(10):1458–1470. doi:10.1101/gr.6208307

18. Gray YHM. It takes two transposons to tango: Transposable-element-mediated chromosomal rearrangements. *Trends in Genetics*. 2000;16(10):461–468. doi:10.1016/S0168-9525(00)02104-1

19. Lim JK. Intrachromosomal rearrangements mediated by hobo transposons in *Drosophila melanogaster*. *Proceedings of the National Academy of Sciences of the United States of America*. 1988;85(23):9153–9157. doi:10.1073/pnas.85.23.9153

20. Koutroumpa FA, Monsempes C, François M-C, Severac D, Montagné N, Meslin C, Jacquin-Joly E. Description of Chemosensory Genes in Unexplored Tissues of the Moth *Spodoptera littoralis*. *Frontiers in Ecology and Evolution*. 2021;0:391. doi:10.3389/FEVO.2021.678277

21. Walker WB, Roy A, Anderson P, Schlyter F, Hansson BS, Larsson MC. Transcriptome Analysis of Gene Families Involved in Chemosensory Function in *Spodoptera littoralis* (Lepidoptera: Noctuidae). *BMC Genomics*. 2019 [accessed 2019 Dec 5];20(1):428. <https://bmcgenomics.biomedcentral.com/articles/10.1186/s12864-019-5815-x>. doi:10.1186/s12864-019-5815-x

22. Poivet E, Gallot A, Montagné N, Glaser N, Legeai F, Jacquin-Joly E. A Comparison of the Olfactory Gene Repertoires of Adults and Larvae in the Noctuid Moth *Spodoptera littoralis*. *PLoS ONE*. 2013;8(4). doi:10.1371/journal.pone.0060263

23. Pelosi P, Iovinella I, Zhu J, Wang G, Dani FR. Beyond chemoreception: diverse tasks of soluble olfactory proteins in insects. *Biological Reviews*. 2018 [accessed 2017 May 15];93(1):184–200. <http://doi.wiley.com/10.1111/brv.12339>. doi:10.1111/brv.12339
24. Robertson HM. Molecular Evolution of the Major Arthropod Chemoreceptor Gene Families. *Annual Review of Entomology*. 2019 [accessed 2018 Oct 16];64(1):annurev-ento-020117-043322. <https://www.annualreviews.org/doi/10.1146/annurev-ento-020117-043322>. doi:10.1146/annurev-ento-020117-043322
25. Johnston JS, Bernardini A, Hjelmen CE. Genome Size Estimation and Quantitative Cytogenetics in Insects. *Methods in molecular biology* (Clifton, N.J.). 2019 [accessed 2021 Nov 19];1858:15–26. <https://pubmed.ncbi.nlm.nih.gov/30414107/>. doi:10.1007/978-1-4939-8775-7\_2
26. Kajitani R, Toshimoto K, Noguchi H, Toyoda A, Ogura Y, Okuno M, Yabana M, Harada M, Nagayasu E, Maruyama H, et al. Efficient de novo assembly of highly heterozygous genomes from whole-genome shotgun short reads. *Genome Research*. 2014 [accessed 2019 Jul 10];24(8):1384–1395. <https://genome.cshlp.org/content/24/8/1384.abstract>. doi:10.1101/GR.170720.113
27. Boetzer M, Pirovano W. SSPACE-LongRead: scaffolding bacterial draft genomes using long read sequence information. *BMC Bioinformatics*. 2014 [accessed 2019 Jun 26];15(1):211. <https://bmcbioinformatics.biomedcentral.com/articles/10.1186/1471-2105-15-211>. doi:10.1186/1471-2105-15-211
28. Boetzer M, Pirovano W. Toward almost closed genomes with GapFiller. *Genome Biology*. 2012 [accessed 2019 Jul 10];13(6):R56. <http://genomebiology.biomedcentral.com/articles/10.1186/gb-2012-13-6-r56>. doi:10.1186/gb-2012-13-6-r56
29. Simão FA, Waterhouse RM, Ioannidis P, Kriventseva E V., Zdobnov EM. BUSCO:

693 assessing genome assembly and annotation completeness with single-copy orthologs.  
694 Bioinformatics. 2015 [accessed 2017 Dec 5];31(19):3210–3212.  
695 <https://academic.oup.com/bioinformatics/article-lookup/doi/10.1093/bioinformatics/btv351>.  
696 doi:10.1093/bioinformatics/btv351

697 30. Hoff KJ, Lange S, Lomsadze A, Borodovsky M, Stanke M. BRAKER1: Unsupervised  
698 RNA-Seq-Based Genome Annotation with GeneMark-ET and AUGUSTUS: Table 1.  
699 Bioinformatics. 2016 [accessed 2019 Jul 10];32(5):767–769.  
700 <http://www.ncbi.nlm.nih.gov/pubmed/26559507>. doi:10.1093/bioinformatics/btv661

701 31. Bolger AM, Lohse M, Usadel B. Trimmomatic: a flexible trimmer for Illumina sequence  
702 data. Bioinformatics. 2014 [accessed 2019 Jul 10];30(15):2114–2120.  
703 <http://www.ncbi.nlm.nih.gov/pubmed/24695404>. doi:10.1093/bioinformatics/btu170

704 32. Dobin A, Davis CA, Schlesinger F, Drenkow J, Zaleski C, Jha S, Batut P, Chaisson M,  
705 Gingeras TR. STAR: ultrafast universal RNA-seq aligner. Bioinformatics. 2013 [accessed  
706 2019 Jul 10];29(1):15–21. <http://www.ncbi.nlm.nih.gov/pubmed/23104886>.  
707 doi:10.1093/bioinformatics/bts635

708 33. Gouin A, Bretaudeau A, Nam K, Gimenez S, Aury JM, Duvic B, Hilliou F, Durand N,  
709 Montagné N, Darboux I, et al. Two genomes of highly polyphagous lepidopteran pests  
710 (*Spodoptera frugiperda*, Noctuidae) with different host-plant ranges. Scientific Reports.  
711 2017;7(1):1–12. doi:10.1038/s41598-017-10461-4

712 34. Zhan S, Merlin C, Boore JL, Reppert SM. The monarch butterfly genome yields insights  
713 into long-distance migration. Cell. 2011;147(5):1171–1185. internal-  
714 pdf://153.165.37.102/Zhan-2011-The monarch butterfly genome yields.pdf.  
715 doi:10.1016/j.cell.2011.09.052

716 35. Camacho C, Coulouris G, Avagyan V, Ma N, Papadopoulos J, Bealer K, Madden TL.  
717 BLAST+: architecture and applications. BMC Bioinformatics. 2009 [accessed 2019 Jun

718 26];10(1):421. <http://www.biomedcentral.com/1471-2105/10/421>. doi:10.1186/1471-2105-  
719 10-421

720 36. Keller O, Odronitz F, Stanke M, Kollmar M, Waack S. Scipio: Using protein sequences to  
721 determine the precise exon/intron structures of genes and their orthologs in closely related  
722 species. BMC Bioinformatics. 2008 [accessed 2018 Jan 16];9(1):278.  
723 <http://bmcbioinformatics.biomedcentral.com/articles/10.1186/1471-2105-9-278>.  
724 doi:10.1186/1471-2105-9-278

725 37. Slater G, Birney E, Box G, Smith T, Waterman M, Altschul S, Gish W, Miller W, Myers  
726 E, Lipman D, et al. Automated generation of heuristics for biological sequence comparison.  
727 BMC Bioinformatics. 2005;6(1):31.  
728 <http://bmcbioinformatics.biomedcentral.com/articles/10.1186/1471-2105-6-31>.  
729 doi:10.1186/1471-2105-6-31

730 38. Lee E, Helt GA, Reese JT, Munoz-Torres MC, Childers CP, Buels RM, Stein L, Holmes  
731 IH, Elisk CG, Lewis SE. Web Apollo: a web-based genomic annotation editing platform.  
732 Genome Biology. 2013 [accessed 2018 Jan 16];14(8):R93.  
733 <http://genomebiology.biomedcentral.com/articles/10.1186/gb-2013-14-8-r93>. doi:10.1186/gb-  
734 2013-14-8-r93

735 39. Walker WB, Roy A, Anderson P, Schlyter F, Hansson BS, Larsson MC. Transcriptome  
736 Analysis of Gene Families Involved in Chemosensory Function in *Spodoptera littoralis*  
737 (Lepidoptera: Noctuidae). BMC Genomics. 2019 [accessed 2019 Jun 4];20(1):428.  
738 <https://bmcbgenomics.biomedcentral.com/articles/10.1186/s12864-019-5815-x>.  
739 doi:10.1186/s12864-019-5815-x

740 40. Almagro Armenteros JJ, Tsirigos KD, Sønderby CK, Petersen TN, Winther O, Brunak S,  
741 von Heijne G, Nielsen H. SignalP 5.0 improves signal peptide predictions using deep neural  
742 networks. Nature Biotechnology. 2019;37(4):420–423. doi:10.1038/s41587-019-0036-z

41. Katoh K, Standley DM. MAFFT Multiple Sequence Alignment Software Version 7: Improvements in Performance and Usability. *Molecular Biology and Evolution*. 2013 [accessed 2018 Jan 16];30(4):772–780. <https://academic.oup.com/mbe/article-lookup/doi/10.1093/molbev/mst010>. doi:10.1093/molbev/mst010
42. Flutre T, Duprat E, Feuillet C, Quesneville H. Considering Transposable Element Diversification in De Novo Annotation Approaches Xu Y, editor. *PLoS ONE*. 2011 [accessed 2019 Jun 26];6(1):e16526. <https://dx.plos.org/10.1371/journal.pone.0016526>. doi:10.1371/journal.pone.0016526
43. Quesneville H, Bergman CM, Andrieu O, Autard D, Nouaud D, Ashburner M, Anxolabehere D. Combined Evidence Annotation of Transposable Elements in Genome Sequences. *PLoS Computational Biology*. 2005 [accessed 2019 Jun 26];1(2):e22. <https://dx.plos.org/10.1371/journal.pcbi.0010022>. doi:10.1371/journal.pcbi.0010022
44. Sheffield NC, Bock C. LOLA: enrichment analysis for genomic region sets and regulatory elements in R and Bioconductor. *Bioinformatics*. 2016 [accessed 2020 Apr 27];32(4):587–589. <https://academic.oup.com/bioinformatics/article-abstract/32/4/587/1743969>. doi:10.1093/bioinformatics/btv612
45. Sievers F, Wilm A, Dineen D, Gibson TJ, Karplus K, Li W, Lopez R, McWilliam H, Remmert M, Soding J, et al. Fast, scalable generation of high-quality protein multiple sequence alignments using Clustal Omega. *Mol Syst Biol*. 2011;7:539. internal-pdf://105.231.243.229/Sievers-2011-Fast, scalable generation of high.pdf. doi:10.1038/msb.2011.75
46. Guindon S, Gascuel O. A simple, fast, and accurate algorithm to estimate large phylogenies by maximum likelihood. *Syst Biol*. 2003;52(5):696–704. [http://www.ncbi.nlm.nih.gov/entrez/query.fcgi?cmd=Retrieve&db=PubMed&dopt=Citation&list\\_uids=14530136](http://www.ncbi.nlm.nih.gov/entrez/query.fcgi?cmd=Retrieve&db=PubMed&dopt=Citation&list_uids=14530136)

- 768 47. Lefort V, Longueville J-E, Gascuel O. SMS: Smart Model Selection in PhyML. *Molecular*  
769 *Biology and Evolution*. 2017 [accessed 2018 Jan 16];34(9):2422–2424.  
770 <http://www.ncbi.nlm.nih.gov/pubmed/28472384>. doi:10.1093/molbev/msx149
- 771 48. Anisimova M, Gascuel O. Approximate likelihood-ratio test for branches: A fast,  
772 accurate, and powerful alternative. *Systematic biology*. 2006;55(4):539–552. internal-  
773 pdf://254.68.141.233/Anisimova-2006-Approximate likelihood-ratio te.pdf
- 774 49. Darby CA, Stolzer M, Ropp PJ, Barker D, Durand D. Xenolog classification.  
775 *Bioinformatics*. 2016 [accessed 2019 Jun 26];33(5):btw686.  
776 <https://academic.oup.com/bioinformatics/article-lookup/doi/10.1093/bioinformatics/btw686>.  
777 doi:10.1093/bioinformatics/btw686
- 778 50. Stolzer M, Lai H, Xu M, Sathaye D, Vernet B, Durand D. Inferring duplications, losses,  
779 transfers and incomplete lineage sorting with nonbinary species trees. *Bioinformatics*. 2012  
780 [accessed 2019 Jun 26];28(18):i409–i415. [https://academic.oup.com/bioinformatics/article-](https://academic.oup.com/bioinformatics/article-lookup/doi/10.1093/bioinformatics/bts386)  
781 [lookup/doi/10.1093/bioinformatics/bts386](https://academic.oup.com/bioinformatics/article-lookup/doi/10.1093/bioinformatics/bts386). doi:10.1093/bioinformatics/bts386
- 782 51. Kumar S, Stecher G, Suleski M, Hedges SB. TimeTree: A Resource for Timelines,  
783 Timetrees, and Divergence Times. *Molecular Biology and Evolution*. 2017 [accessed 2019  
784 Jun 26];34(7):1812–1819. <http://www.ncbi.nlm.nih.gov/pubmed/28387841>.  
785 doi:10.1093/molbev/msx116
- 786 52. Yang Z. PAML 4: Phylogenetic analysis by maximum likelihood. *Mol Biol Evol*.  
787 2007;24:1586–1591. internal-pdf://120.223.106.85/Yang-2007-PAML 4\_ Phylogenetic  
788 analysis by max.pdf
- 789 53. Suyama M, Torrents D, Bork P. PAL2NAL: robust conversion of protein sequence  
790 alignments into the corresponding codon alignments. *Nucleic Acids Res*. 2006;34(Web Server  
791 issue):W609-12.
- 792 54. Yang Z, Swanson WJ, Vacquier VD. Maximum-likelihood analysis of molecular

793 adaptation in abalone sperm lysin reveals variable selective pressures among lineages and  
794 sites. *Mol Biol Evol.* 2000;17(10):1446–1455. internal-pdf://118.68.164.92/Yang-2000-  
795 Maximum-likelihood analysis of molec.pdf  
796 55. Swanson WJ, Nielsen R, Yang Q. Pervasive adaptive evolution in mammalian fertilization  
797 proteins. *Mol Biol Evol.* 2003;20(1):18–20.  
798 56. Wong WS, Yang Z, Goldman N, Nielsen R. Accuracy and power of statistical methods  
799 for detecting adaptive evolution in protein coding sequences and for identifying positively  
800 selected sites. *Genetics.* 2004;168(2):1041–1051.  
801 57. Zhang J, Nielsen R, Yang Z. Evaluation of an improved branch-site likelihood method for  
802 detecting positive selection at the molecular level. *Mol Biol Evol.* 2005;22(12):2472–2479.  
803 internal-pdf://240.85.165.245/Zhang-2005-Evaluation of an improved branch-si.pdf  
804 58. Storey J, Bass A, Dabney A, Robinson D. qvalue: Q-value estimation for false discovery  
805 rate control. 2021 [accessed 2021 Dec 6]:R package version 2.22.0.  
806 <https://www.bioconductor.org/packages/release/bioc/html/qvalue.html>  
807 59. Jumper J, Evans R, Pritzel A, Green T, Figurnov M, Ronneberger O, Tunyasuvunakool K,  
808 Bates R, Žídek A, Potapenko A, et al. Highly accurate protein structure prediction with  
809 AlphaFold. *Nature.* 2021 [accessed 2021 Aug 3];596(7873):583–589.  
810 <https://doi.org/10.1038/s41586-021-03819-2>. doi:10.1038/s41586-021-03819-2  
811 60. Pettersen EF, Goddard TD, Huang CC, Couch GS, Greenblatt DM, Meng EC, Ferrin TE.  
812 UCSF Chimera—a visualization system for exploratory research and analysis. *Journal of*  
813 *computational chemistry.* 2004;25(13):1605–1612. internal-pdf://3.231.87.78/Pettersen-2004-  
814 UCSF Chimera—a visualization sy.pdf  
815 61. Rytz R, Croset V, Benton R. Ionotropic Receptors (IRs): Chemosensory ionotropic  
816 glutamate receptors in *Drosophila* and beyond. *Insect Biochemistry and Molecular Biology.*  
817 2013;43(9):888–897. doi:10.1016/j.ibmb.2013.02.007

- 818 62. Benton R, Vannice KS, Gomez-Diaz C, Voss hall LB. Variant Ionotropic Glutamate  
819 Receptors as Chemosensory Receptors in *Drosophila*. *Cell*. 2009;136(1):149–162.  
820 doi:10.1016/j.cell.2008.12.001
- 821 63. Croset V, Schleyer M, Arguello JR, Gerber B, Benton R. A molecular and neuronal basis  
822 for amino acid sensing in the *Drosophila* larva. *Scientific Reports*. 2016;6.  
823 doi:10.1038/srep34871
- 824 64. Croset V, Rytz R, Cummins SF, Budd A, Brawand D, Kaessmann H, Gibson TJ, Benton  
825 R. Ancient Protostome Origin of Chemosensory Ionotropic Glutamate Receptors and the  
826 Evolution of Insect Taste and Olfaction Stern DL, editor. *PLoS Genetics*. 2010 [accessed  
827 2018 Jan 8];6(8):e1001064. <http://dx.plos.org/10.1371/journal.pgen.1001064>.  
828 doi:10.1371/journal.pgen.1001064
- 829 65. Zhu JY, Xu ZW, Zhang XM, Liu NY. Genome-based identification and analysis of  
830 ionotropic receptors in *Spodoptera litura*. *Science of Nature*. 2018;105(5–6).  
831 doi:10.1007/s00114-018-1563-z
- 832 66. Pearce SL, Clarke DF, East PD, Elfekih S, Gordon KHJ, Jermini LS, Mcgaughran A,  
833 Oakeshott JG, Papanikolaou A, Perera OP, et al. Genomic innovations, transcriptional  
834 plasticity and gene loss underlying the evolution and divergence of two highly polyphagous  
835 and invasive *Helicoverpa* pest species. [accessed 2017 Aug 8].  
836 [https://bmcbiol.biomedcentral.com/track/pdf/10.1186/s12915-017-0402-](https://bmcbiol.biomedcentral.com/track/pdf/10.1186/s12915-017-0402-6?site=bmcbiol.biomedcentral.com)  
837 [6?site=bmcbiol.biomedcentral.com](https://bmcbiol.biomedcentral.com/track/pdf/10.1186/s12915-017-0402-6?site=bmcbiol.biomedcentral.com). doi:10.1186/s12915-017-0402-6
- 838 67. Wang Y, Fang G, Chen X, Cao Y, Wu N, Cui Q, Zhu C, Qian L, Huang Y, Zhan S. The  
839 genome of the black cutworm *Agrotis ipsilon*. *Insect Biochemistry and Molecular Biology*.  
840 2021;139:103665. doi:10.1016/J.IBMB.2021.103665
- 841 68. Kasubuchi M, Shii F, Tsuneto K, Yamagishi T, Adegawa S, Endo H, Sato R. Insect taste  
842 receptors relevant to host identification by recognition of secondary metabolite patterns of



843 non-host plants. *Biochemical and Biophysical Research Communications*. 2018:2–7.  
 844 <http://linkinghub.elsevier.com/retrieve/pii/S0006291X18307770>.  
 845 doi:10.1016/j.bbrc.2018.04.014

846 69. Parisot N, Vargas-Chávez C, Goubert C, Baa-Puyoulet P, Balmand S, Beranger L, Blanc  
 847 C, Bonnamour A, Boulesteix M, Burlet N, et al. The transposable element-rich genome of the  
 848 cereal pest *Sitophilus oryzae*. *BMC Biology* 2021 19:1. 2021 [accessed 2021 Nov  
 849 19];19(1):1–28. <https://bmcbiol.biomedcentral.com/articles/10.1186/s12915-021-01158-2>.  
 850 doi:10.1186/S12915-021-01158-2

851 70. Rebollo R, Romanish MT, Mager DL. Transposable Elements: An Abundant and Natural  
 852 Source of Regulatory Sequences for Host Genes. [http://dx.doi.org/10.1146/annurev-genet-](http://dx.doi.org/10.1146/annurev-genet-110711-155621)  
 853 110711-155621. 2012 [accessed 2021 Nov 19];46:21–42.  
 854 <https://www.annualreviews.org/doi/abs/10.1146/annurev-genet-110711-155621>.  
 855 doi:10.1146/ANNUREV-GENET-110711-155621

856 71. Chuong EB, Elde NC, Feschotte C. Regulatory activities of transposable elements: from  
 857 conflicts to benefits. *Nature reviews. Genetics*. 2016;advance on(2):71–86.  
 858 <http://dx.doi.org/10.1038/nrg.2016.139>. doi:10.1038/nrg.2016.139

859 72. Chen S, Li X. Transposable elements are enriched within or in close proximity to  
 860 xenobiotic-metabolizing cytochrome P450 genes. *BMC Evolutionary Biology*. 2007  
 861 [accessed 2021 Nov 19];7(1):1–13.  
 862 <https://bmcecolevol.biomedcentral.com/articles/10.1186/1471-2148-7-46>. doi:10.1186/1471-  
 863 2148-7-46/TABLES/2

864 73. You M, Yue Z, He W, Yang X, Yang G, Xie M, Zhan D, Baxter SW, Vasseur L, Gurr  
 865 GM, et al. A heterozygous moth genome provides insights into herbivory and detoxification.  
 866 *Nature Genetics* 2013 45:2. 2013 [accessed 2021 Nov 19];45(2):220–225.  
 867 <https://www.nature.com/articles/ng.2524>. doi:10.1038/ng.2524

- 868 74. Singh KS, Troczka BJ, Duarte A, Balabanidou V, Trissi N, Carabajal Paladino LZ,  
869 Nguyen P, Zimmer CT, Papapostolou KM, Randall E, et al. The genetic architecture of a host  
870 shift: An adaptive walk protected an aphid and its endosymbiont from plant chemical  
871 defenses. *Science Advances*. 2020 [accessed 2021 Nov 19];6(19).  
872 <https://www.science.org/doi/abs/10.1126/sciadv.aba1070>.  
873 doi:10.1126/SCIADV.ABA1070/SUPPL\_FILE/ABA1070\_SM.PDF
- 874 75. Maumus F, Fiston-Lavier AS, Quesneville H. Impact of transposable elements on insect  
875 genomes and biology. *Current Opinion in Insect Science*. 2015;7:30–36.  
876 <http://dx.doi.org/10.1016/j.cois.2015.01.001>. doi:10.1016/j.cois.2015.01.001
- 877 76. Harrison MC, Jongepier E, Robertson HM, Arning N, Bitard-Feildel T, Chao H, Childers  
878 CP, Dinh H, Doddapaneni H, Dugan S, et al. Hemimetabolous genomes reveal molecular  
879 basis of termite eusociality. *Nature Ecology & Evolution* 2017 2:3. 2018 [accessed 2021 Nov  
880 19];2(3):557–566. <https://www.nature.com/articles/s41559-017-0459-1>. doi:10.1038/s41559-  
881 017-0459-1
- 882 77. Zhang F, Zhang J, Yang Y, Wu Y. A chromosome-level genome assembly for the beet  
883 armyworm (*Spodoptera exigua*) using PacBio and Hi-C sequencing. *bioRxiv*. 2019 Jan  
884 1:2019.12.26.889121.  
885 <http://biorxiv.org/content/early/2019/12/28/2019.12.26.889121.abstract>.  
886 doi:10.1101/2019.12.26.889121
- 887 78. Petersen M, Armisen D, Gibbs RA, Hering L, Khila A, Mayer G, Richards S, Niehuis O,  
888 Misof B. Diversity and evolution of the transposable element repertoire in arthropods with  
889 particular reference to insects. *BMC Evolutionary Biology*. 2019;19(1). doi:10.1186/s12862-  
890 018-1324-9
- 891 79. Hebert FO, Freschi L, Blackburn G, Béliveau C, Dewar K, Boyle B, Gundersen-Rindal  
892 DE, Sparks ME, Cusson M, Hamelin RC, et al. Expansion of LINEs and species-specific

893 DNA repeats drives genome expansion in Asian Gypsy Moths. *Scientific Reports*.  
894 2019;9(1):1–10. doi:10.1038/s41598-019-52840-z

895 80. Fiston-Lavier AS, Anxolabehere D, Quesneville H. A model of segmental duplication  
896 formation in *Drosophila melanogaster*. *Genome Research*. 2007 [accessed 2020 Dec  
897 17];17(10):1458–1470. [www.genome.org/cgi/doi/10.1101/gr.6208307](http://www.genome.org/cgi/doi/10.1101/gr.6208307).  
898 doi:10.1101/gr.6208307

899 81. Remnant EJ, Good RT, Schmidt JM, Lumb C, Robin C, Daborn PJ, Batterham P. Gene  
900 duplication in the major insecticide target site, *Rdl*, in *Drosophila melanogaster*. *Proceedings*  
901 *of the National Academy of Sciences of the United States of America*. 2013 [accessed 2020  
902 Dec 17];110(36):14706–14710. [www.pnas.org/cgi/doi/10.1073/pnas.1311341110](http://www.pnas.org/cgi/doi/10.1073/pnas.1311341110).  
903 doi:10.1073/pnas.1311341110

904 82. Mathiopoulos KD, Della Torre A, Predazzi V, Petrarca V, Coluzzi M. Cloning of  
905 inversion breakpoints in the *Anopheles gambiae* complex traces a transposable element at the  
906 inversion junction. *Proceedings of the National Academy of Sciences of the United States of*  
907 *America*. 1998 [accessed 2020 Dec 17];95(21):12444–12449.  
908 [/pmc/articles/PMC22850/?report=abstract](http://pmc/articles/PMC22850/?report=abstract). doi:10.1073/pnas.95.21.12444

909 83. McKenzie SK, Kronauer DJC. The genomic architecture and molecular evolution of ant  
910 odorant receptors. *Genome research*. 2018 Sep 24 [accessed 2018 Oct 1];gr.237123.118.  
911 <http://www.ncbi.nlm.nih.gov/pubmed/30249741>. doi:10.1101/gr.237123.118

912 84. McBride CS, Arguello JR. Five *Drosophila* genomes reveal nonneutral evolution and the  
913 signature of host specialization in the chemoreceptor superfamily. *Genetics*. 2007 [accessed  
914 2021 Jul 2];177(3):1395–1416. <https://pubmed.ncbi.nlm.nih.gov/18039874/>.  
915 doi:10.1534/genetics.107.078683

916 85. Smadja C, Shi P, Butlin RK, Robertson HM. Large gene family expansions and adaptive  
917 evolution for odorant and gustatory receptors in the pea aphid, *Acyrtosiphon pisum*.

918 Molecular Biology and Evolution. 2009;26(9):2073–2086. doi:10.1093/molbev/msp116

919 86. Hickner P V., Rivaldi CL, Johnson CM, Siddappaji M, Raster GJ, Syed Z. The making of

920 a pest: Insights from the evolution of chemosensory receptor families in a pestiferous and

921 invasive fly, *Drosophila suzukii*. BMC Genomics. 2016 [accessed 2018 Jan 8];17(1):648.

922 <http://bmcbgenomics.biomedcentral.com/articles/10.1186/s12864-016-2983-9>.

923 doi:10.1186/s12864-016-2983-9

924 87. Diaz F, Allan CW, Matzkin LM. Positive selection at sites of chemosensory genes is

925 associated with the recent divergence and local ecological adaptation in cactophilic

926 *Drosophila*. BMC Evolutionary Biology. 2018 [accessed 2018 Sep 25];18(1):144.

927 <https://bmcevolbiol.biomedcentral.com/articles/10.1186/s12862-018-1250-x>.

928 doi:10.1186/s12862-018-1250-x

929 88. Smadja CM, Canbäck B, Vitalis R, Gautier M, Ferrari J, Zhou J-J, Butlin RK. LARGE-

930 SCALE CANDIDATE GENE SCAN REVEALS THE ROLE OF CHEMORECEPTOR

931 GENES IN HOST PLANT SPECIALIZATION AND SPECIATION IN THE PEA APHID.

932 Evolution. 2012 [accessed 2016 Oct 6];66(9):2723–2738.

933 <http://doi.wiley.com/10.1111/j.1558-5646.2012.01612.x>. doi:10.1111/j.1558-

934 5646.2012.01612.x

935 89. Eyres I, Duvaux L, Gharbi K, Tucker R, Hopkins D, Simon JC, Ferrari J, Smadja CM,

936 Butlin RK. Targeted re-sequencing confirms the importance of chemosensory genes in aphid

937 host race differentiation. Molecular Ecology. 2017;26(1):43–58. doi:10.1111/mec.13818

938 90. Nouhaud P, Gautier M, Gouin A, Jaquiéry J, Peccoud J, Legeai F, Mieuzet L, Smadja

939 CM, Lemaitre C, Vitalis R, et al. Identifying Genomic Hotspots Of Differentiation And

940 Candidate Genes Involved In The Adaptive Divergence Of Pea Aphid Host Races. Molecular

941 Ecology. 2018:0–3. <http://doi.wiley.com/10.1111/mec.14799>. doi:10.1111/mec.14799

942 91. Engsontia P, Sangket U, Chotigeat W, Satasook C. Molecular evolution of the odorant and

gustatory receptor genes in lepidopteran insects: Implications for their adaptation and  
speciation. *Journal of Molecular Evolution*. 2014;79(1–2):21–39. doi:10.1007/s00239-014-  
9633-0

92. Suzuki HC, Ozaki K, Makino T, Uchiyama H, Yajima S, Kawata M. Evolution of  
gustatory receptor gene family provides insights into adaptation to diverse host plants in  
nymphalid butterflies. *Genome Biology and Evolution*. 2018;(May).  
<https://academic.oup.com/gbe/advance-article/doi/10.1093/gbe/evy093/4999382>.  
doi:10.1093/gbe/evy093

93. Dweck HKM, Carlson JR. Molecular Logic and Evolution of Bitter Taste in *Drosophila*.  
*Current Biology*. 2020 [accessed 2019 Dec 18];30(1):17-30.e3.  
<https://doi.org/10.1016/j.cub.2019.11.005>. doi:10.1016/j.cub.2019.11.005

94. Mang D, Shu M, Tanaka S, Nagata S, Takada T, Endo H, Kikuta S, Tabunoki H,  
Iwabuchi K, Sato R. Expression of the fructose receptor BmGr9 and its involvement in the  
promotion of feeding, suggested by its co-expression with neuropeptide F1 in *Bombyx mori*.  
*Insect Biochemistry and Molecular Biology*. 2016;75:58–69.  
doi:10.1016/J.IBMB.2016.06.001

95. Sato K, Tanaka K, Touhara K. Sugar-regulated cation channel formed by an insect  
gustatory receptor. *Proceedings of the National Academy of Sciences*. 2011;108(28):11680–  
11685. <http://www.pnas.org/cgi/doi/10.1073/pnas.1019622108>.  
doi:10.1073/pnas.1019622108

96. Zhang Z-J, Zhang S-S, Niu B-L, Ji D-F, Liu X-J, Li M-W, Bai H, Palli SR, Wang C-Z,  
Tan A-J. A determining factor for insect feeding preference in the silkworm, *Bombyx mori*  
Agrawal AA, editor. *PLOS Biology*. 2019 [accessed 2019 Mar 13];17(2):e3000162.  
<http://dx.plos.org/10.1371/journal.pbio.3000162>. doi:10.1371/journal.pbio.3000162

97. Wicker T, Sabot F, Hua-Van A, Bennetzen JL, Capy P, Chalhoub B, Flavell A, Leroy P,

968 Morgante M, Panaud O, et al. A unified classification system for eukaryotic transposable  
 969 elements. Nature Reviews Genetics. 2007 [accessed 2017 Jun 6];8(12):973–982.  
 970 <http://www.nature.com/doifinder/10.1038/nrg2165>. doi:10.1038/nrg2165  
 971

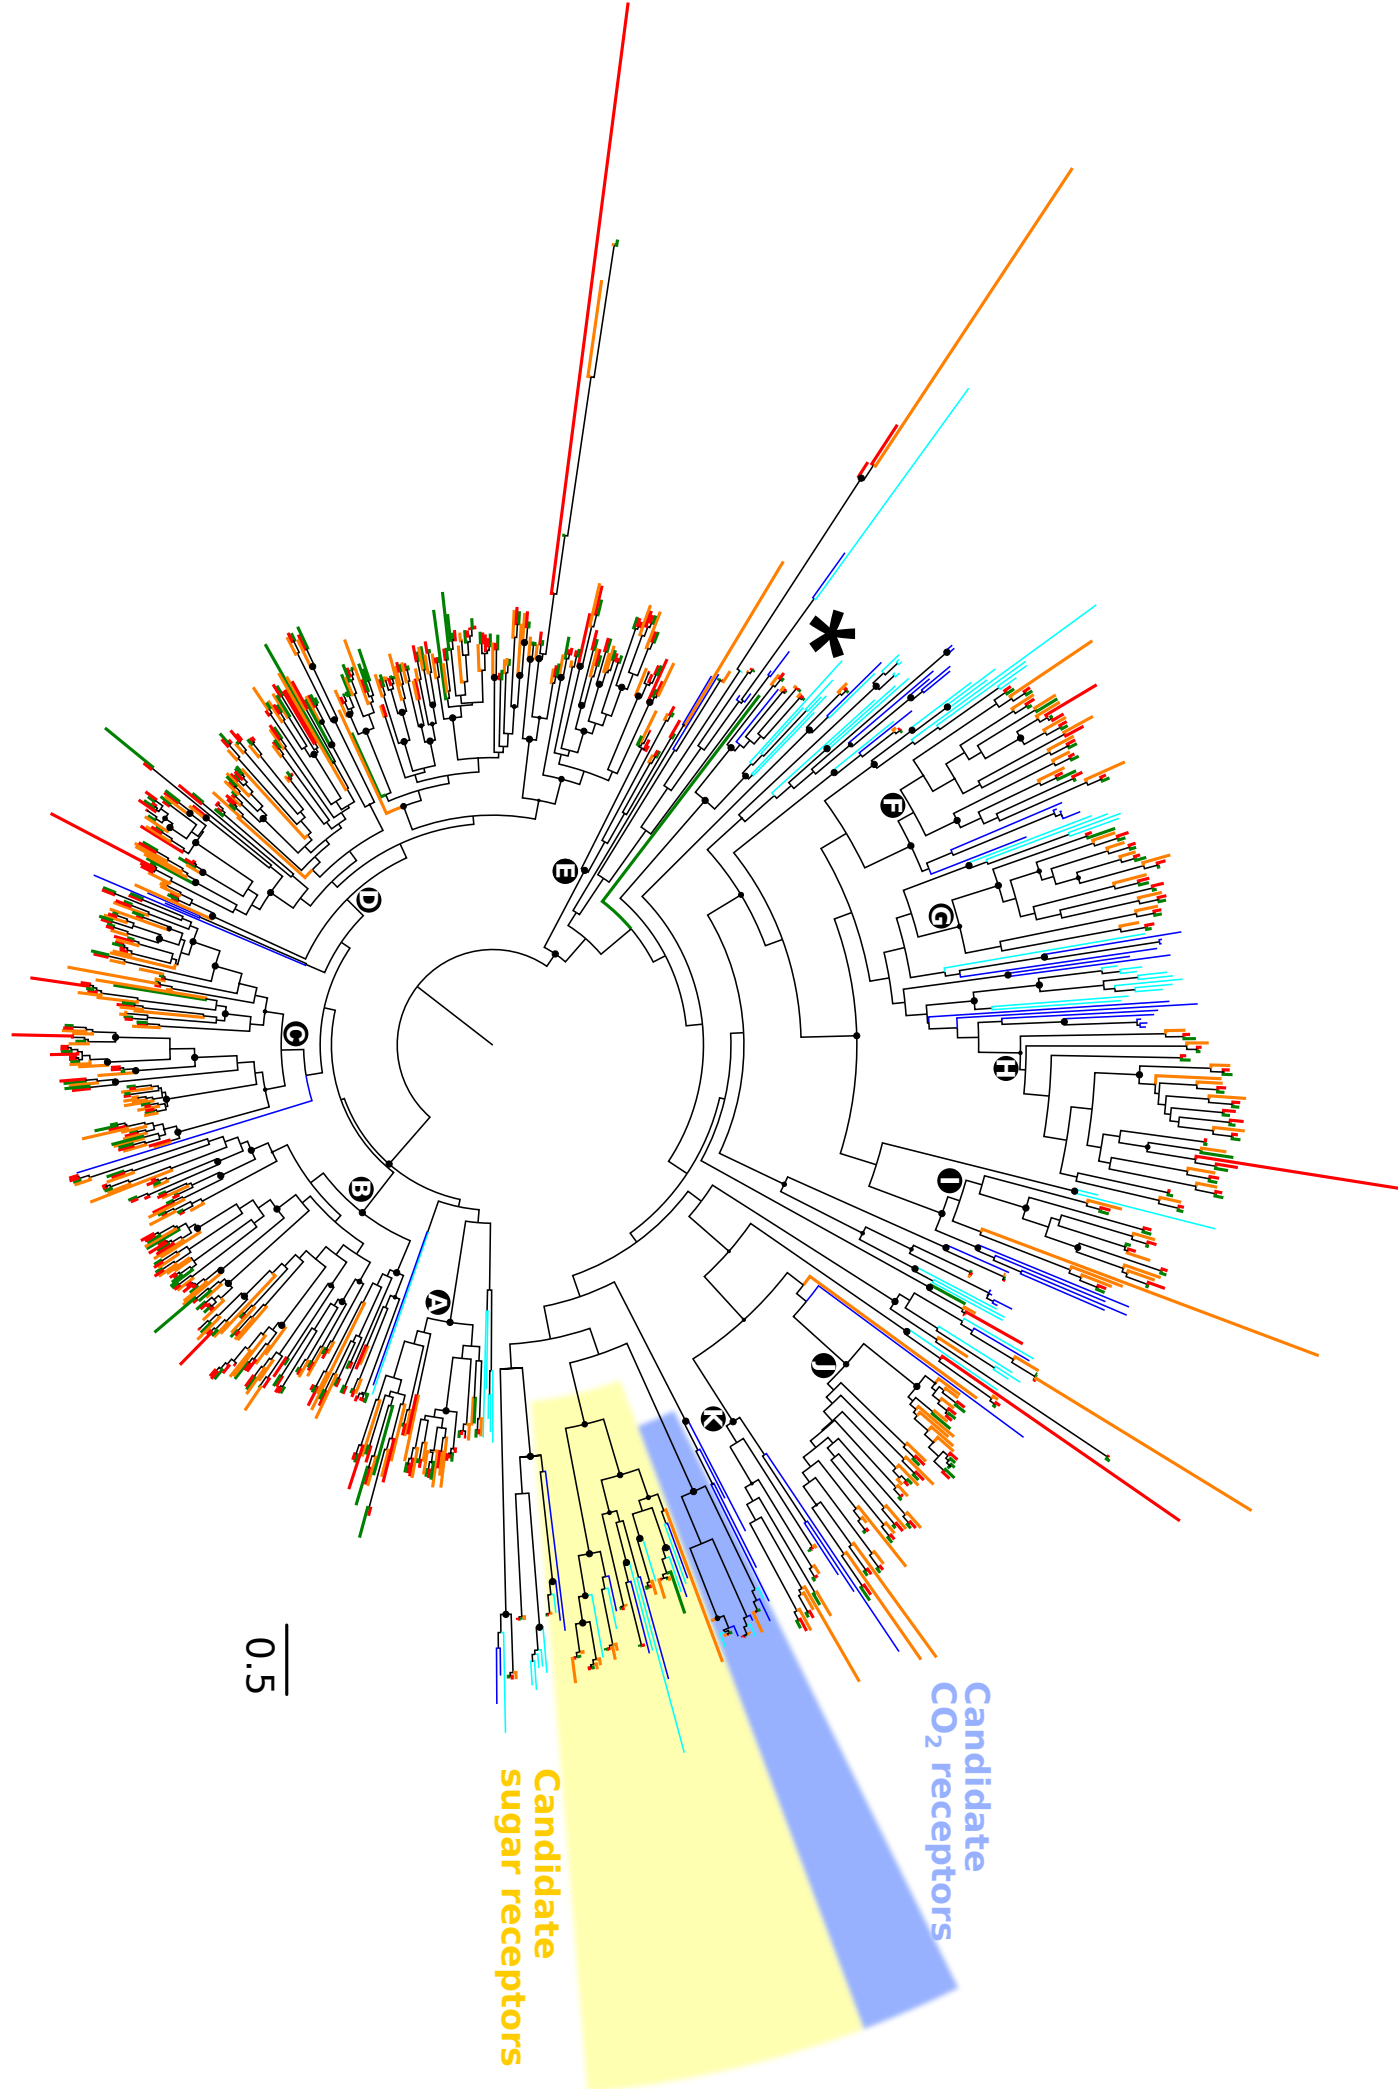

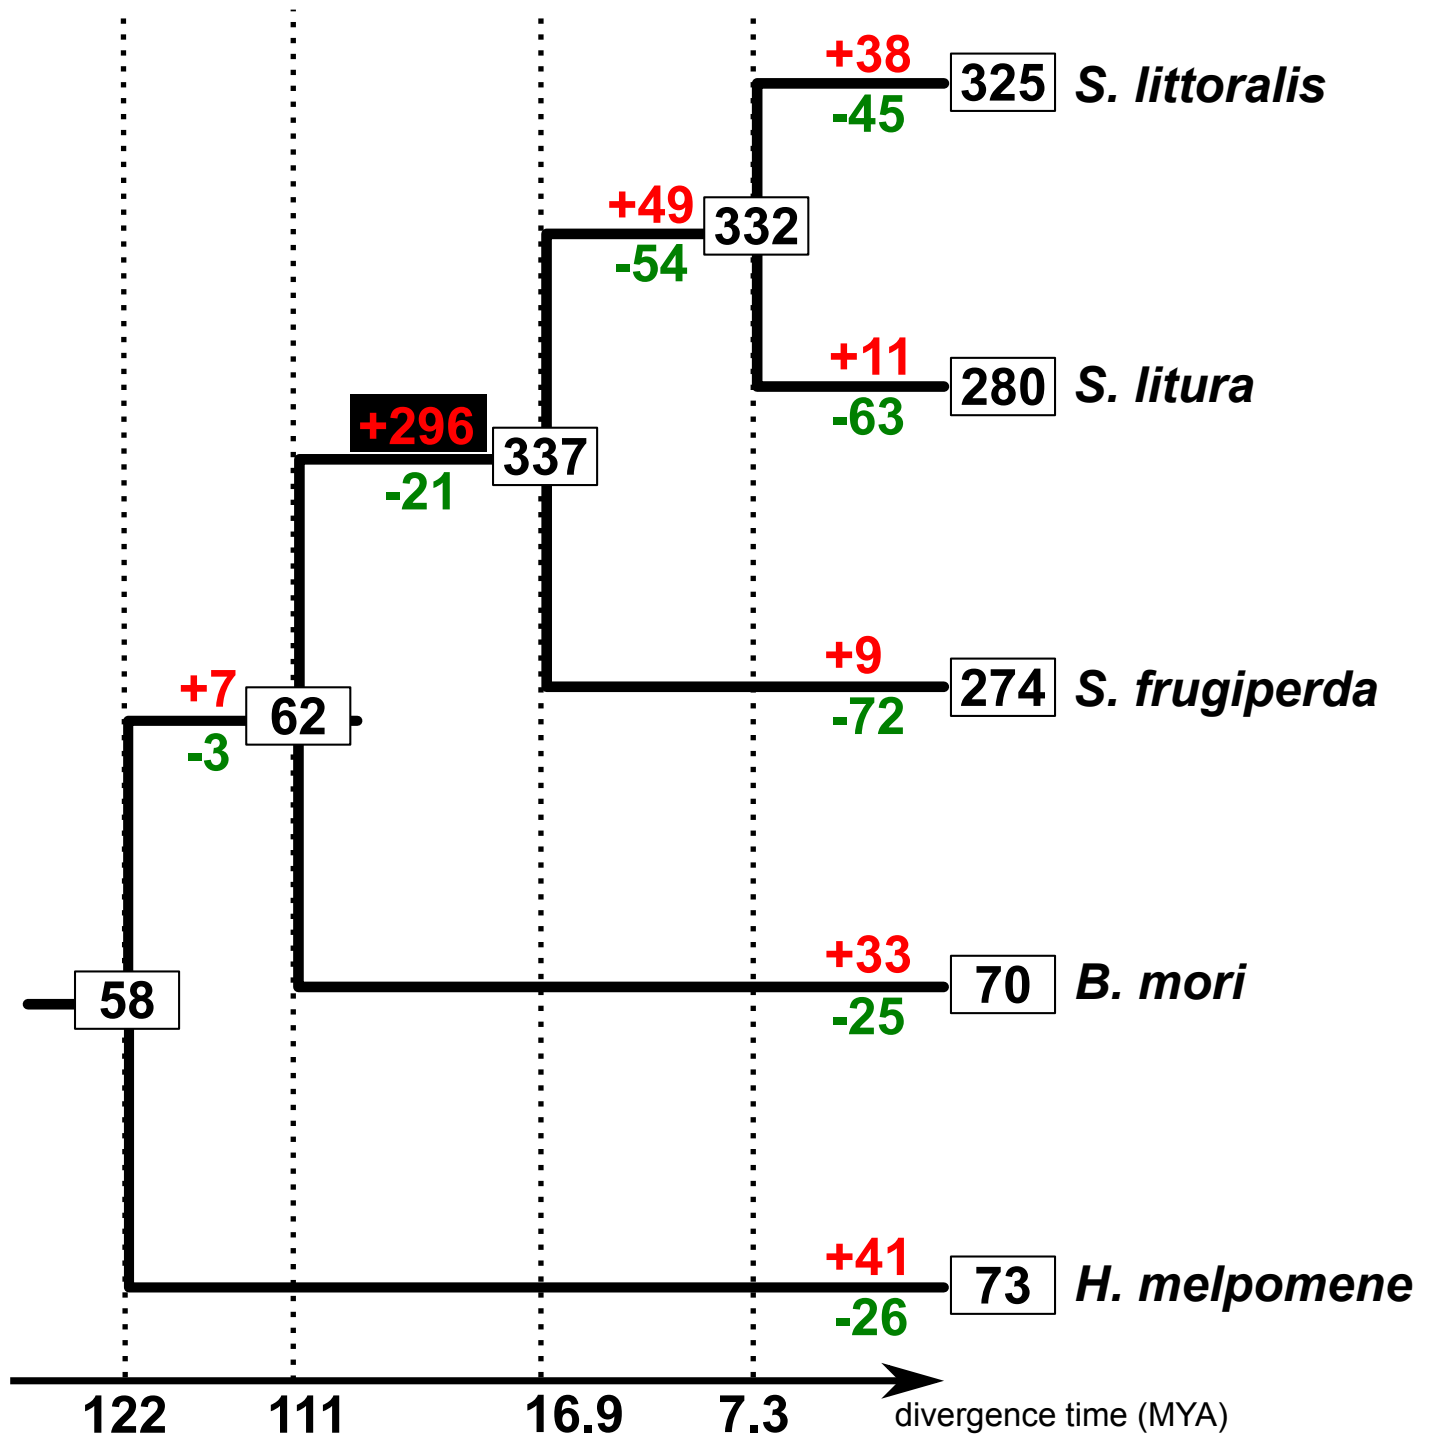



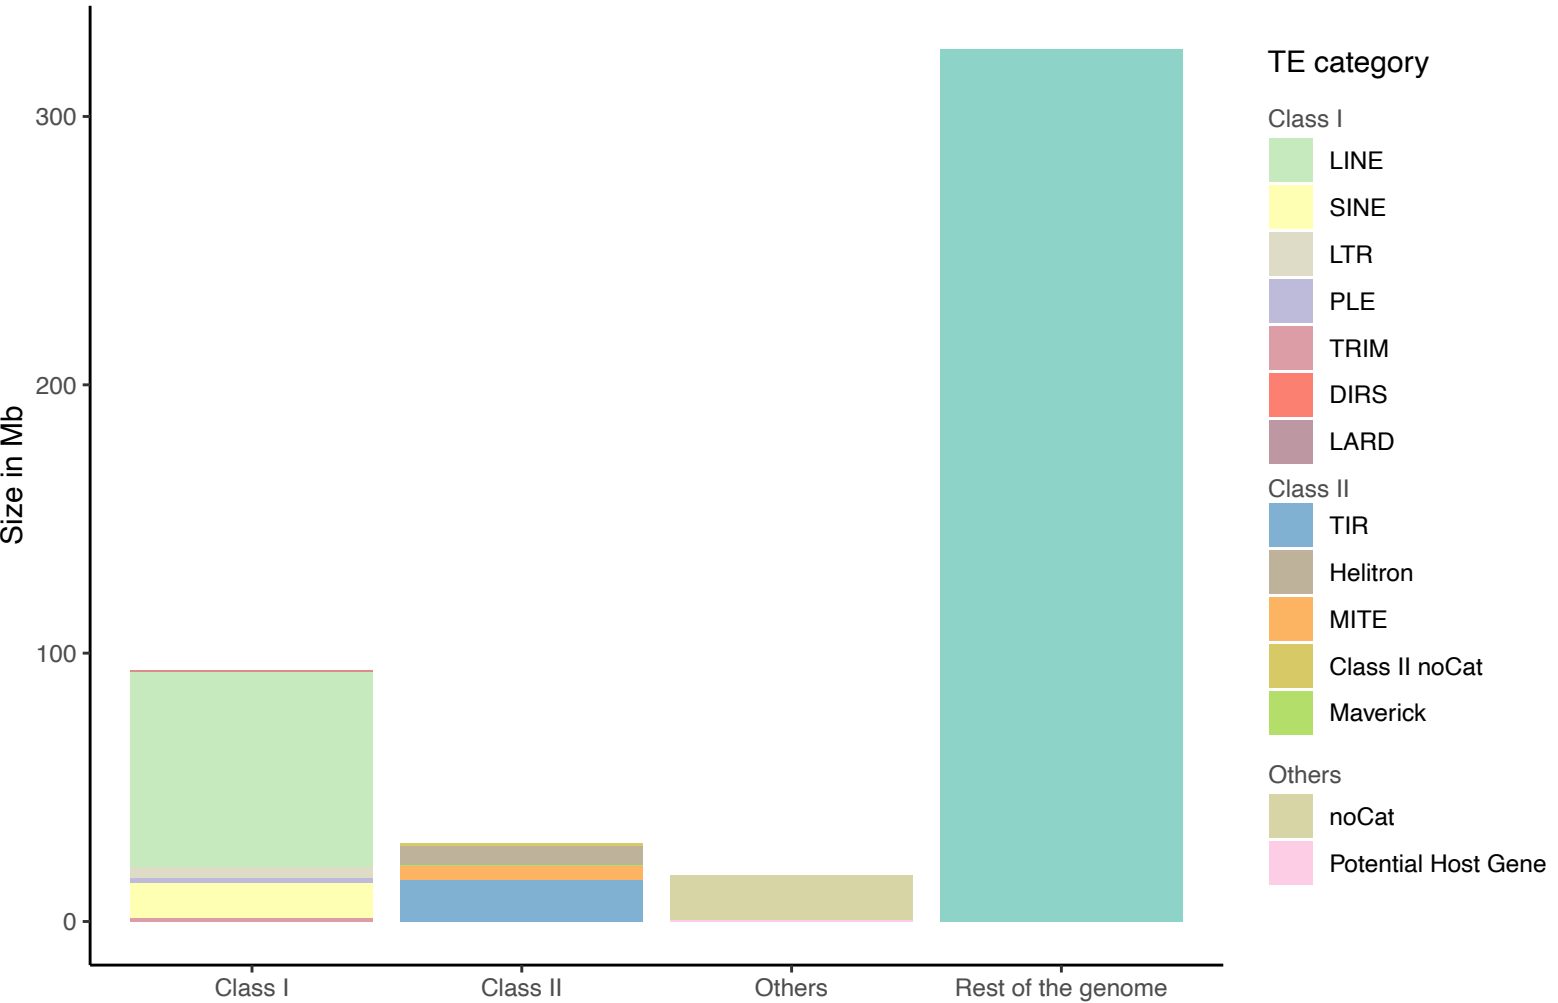

**A**

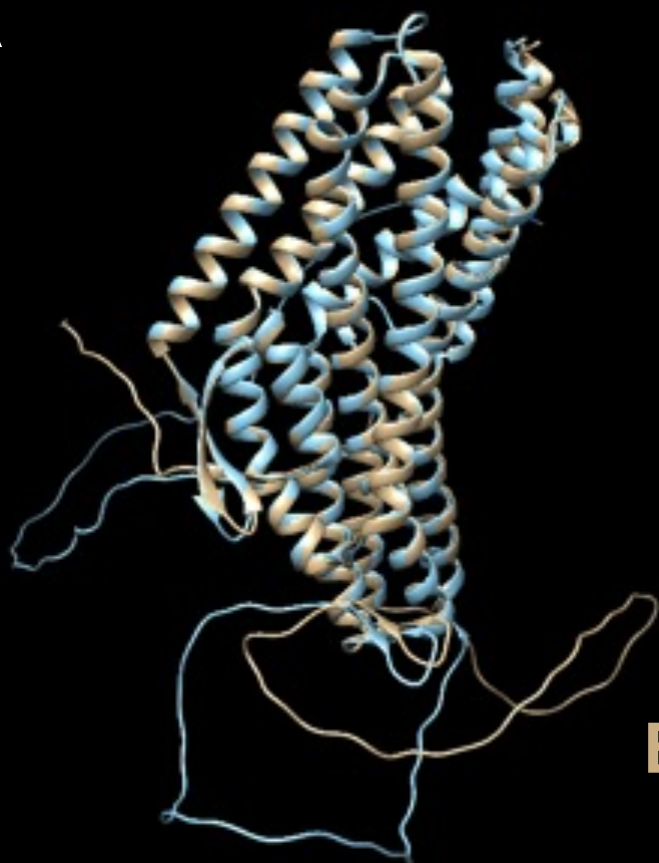

**B**

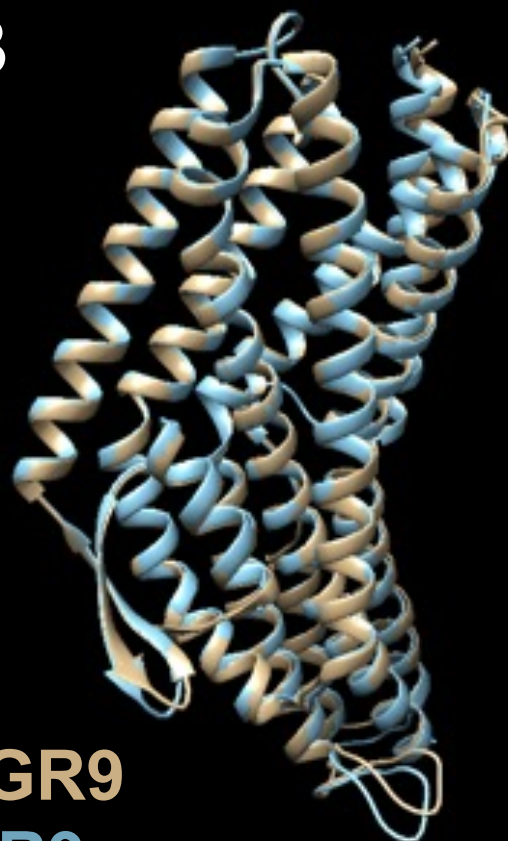

**BmorGR9**  
**SlitGR9**

**C**

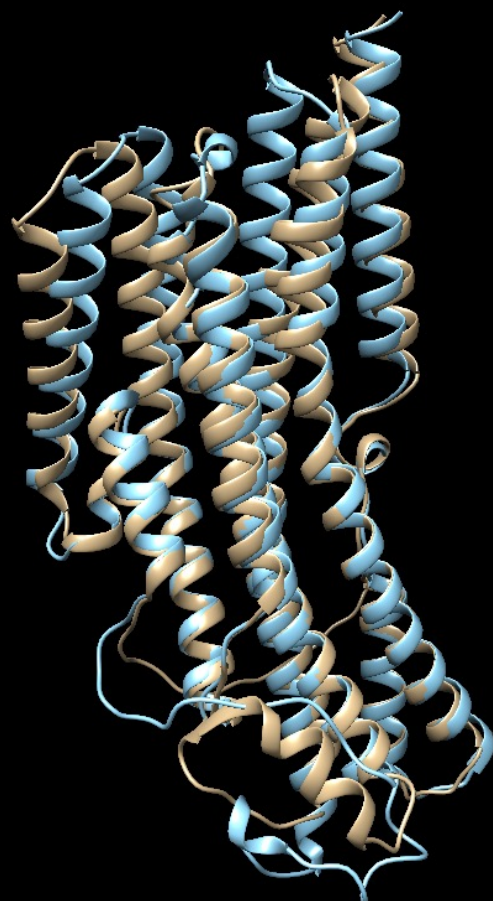

**D**

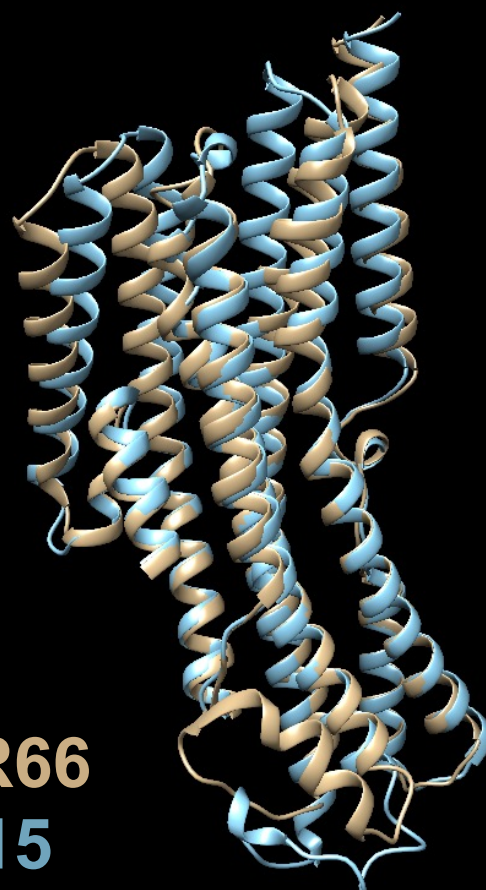

**BmorGR66**  
**SlitGR15**

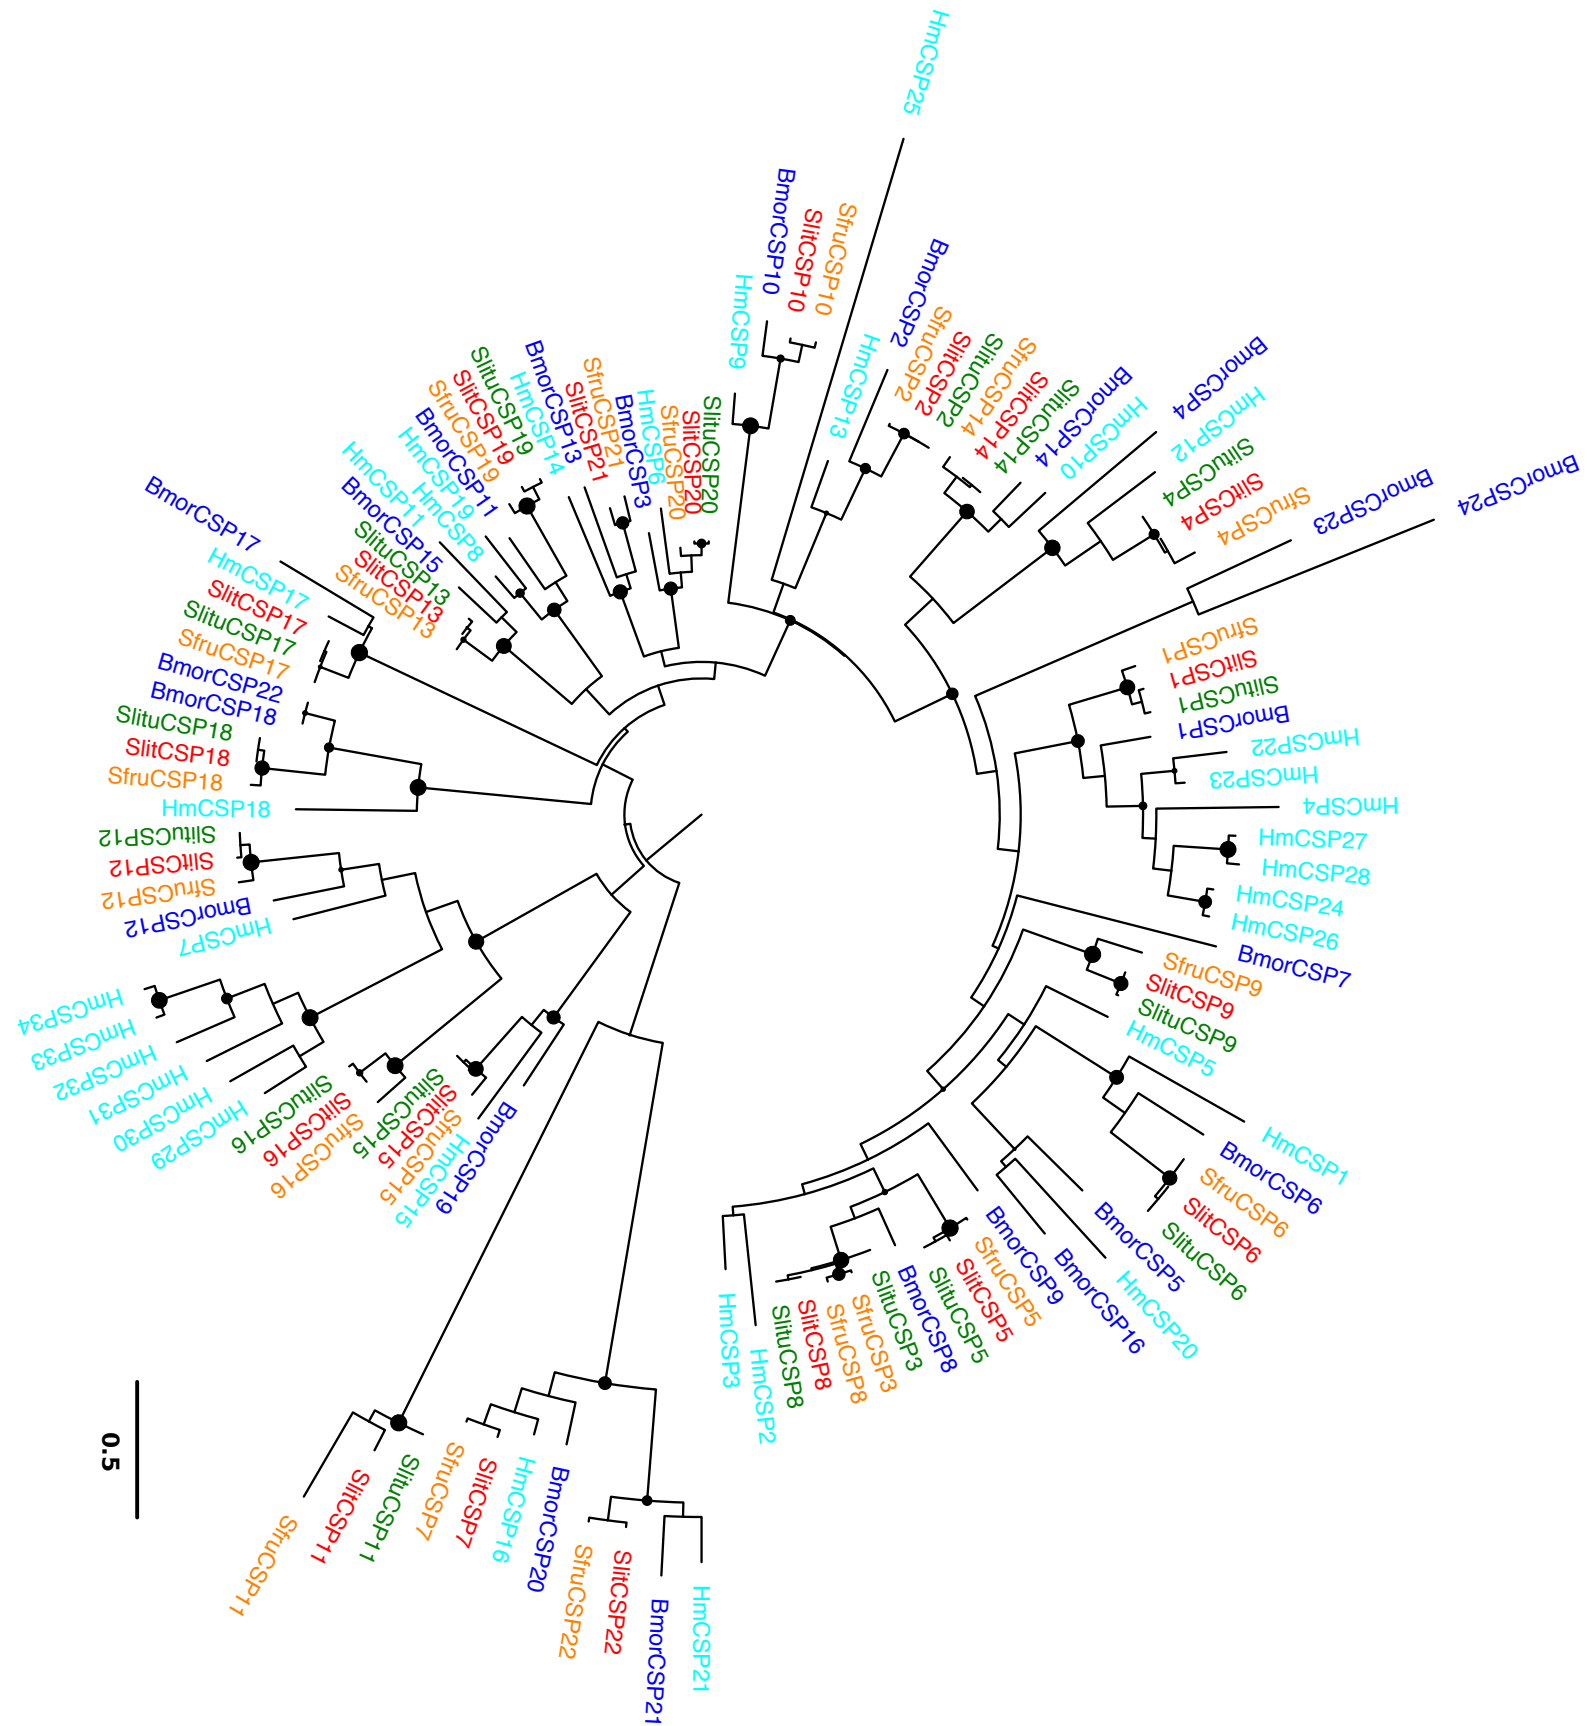

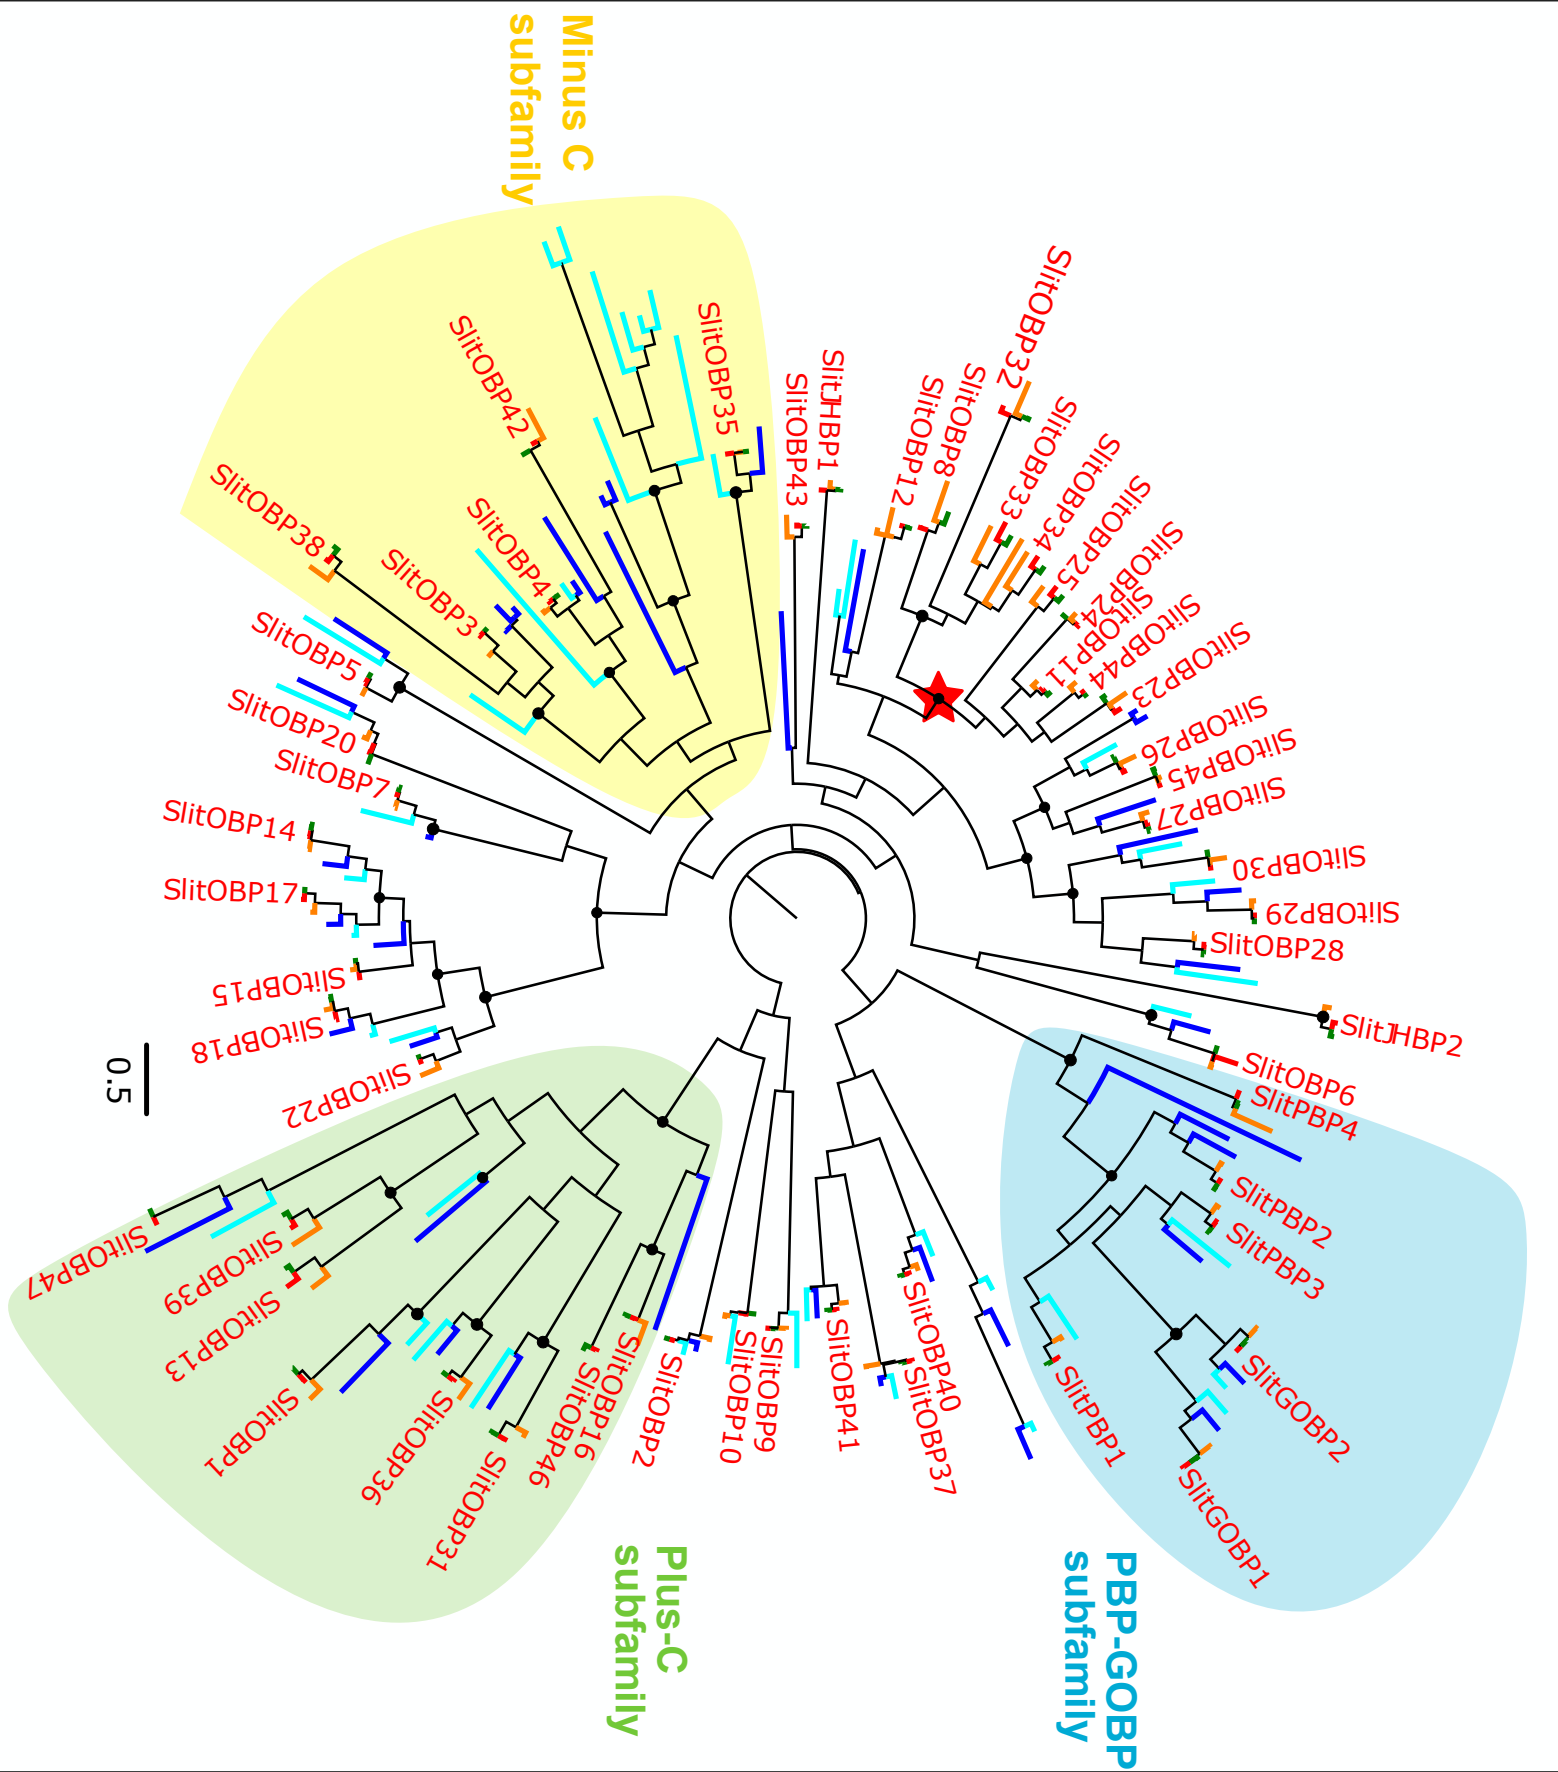

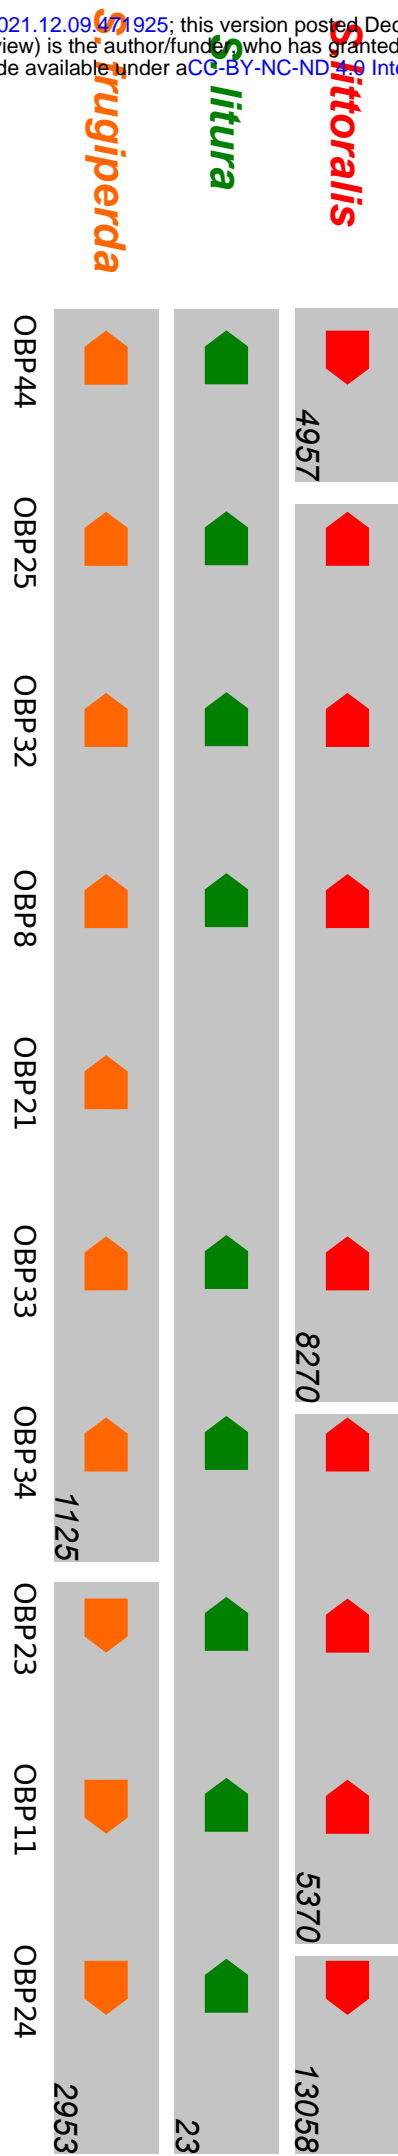

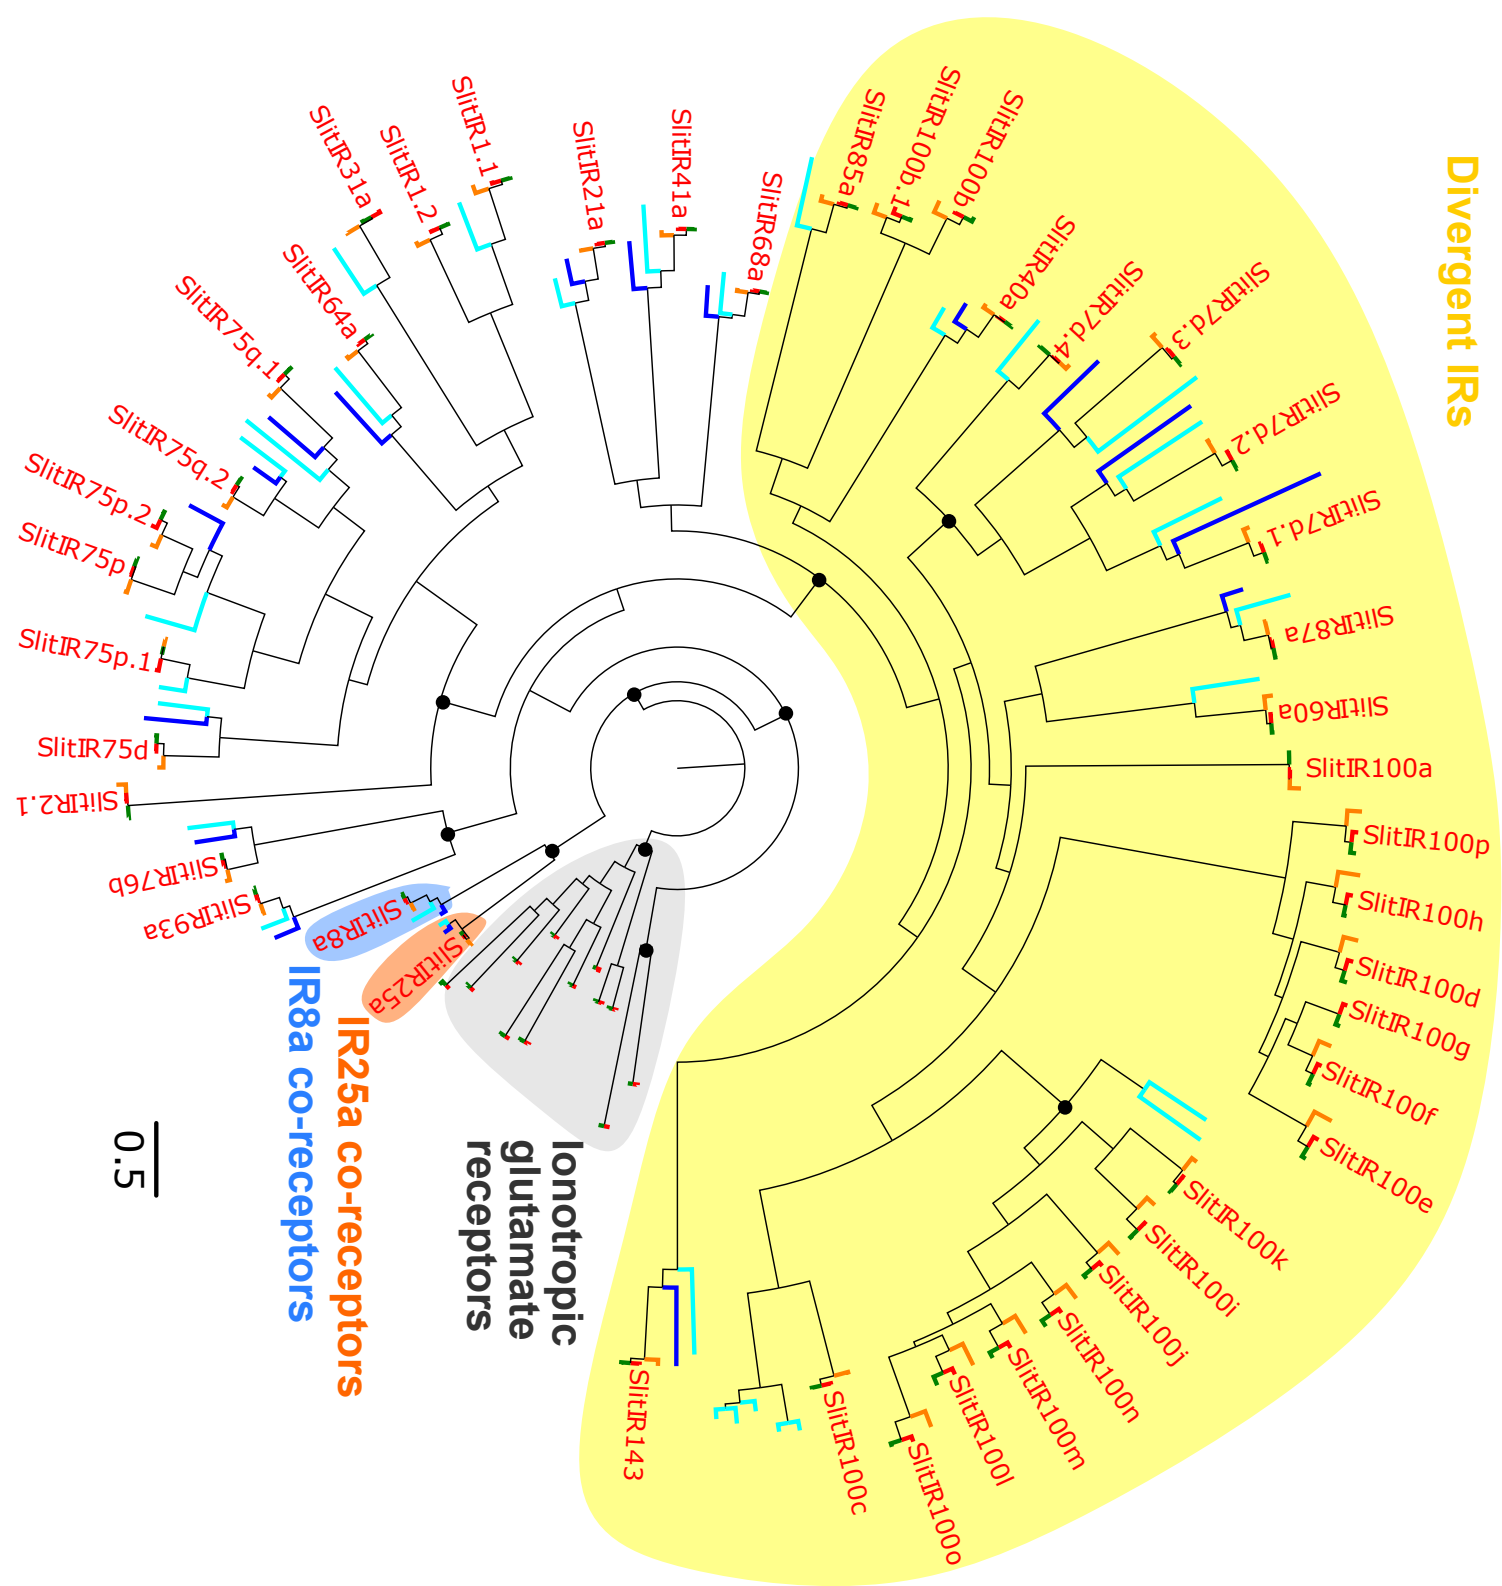



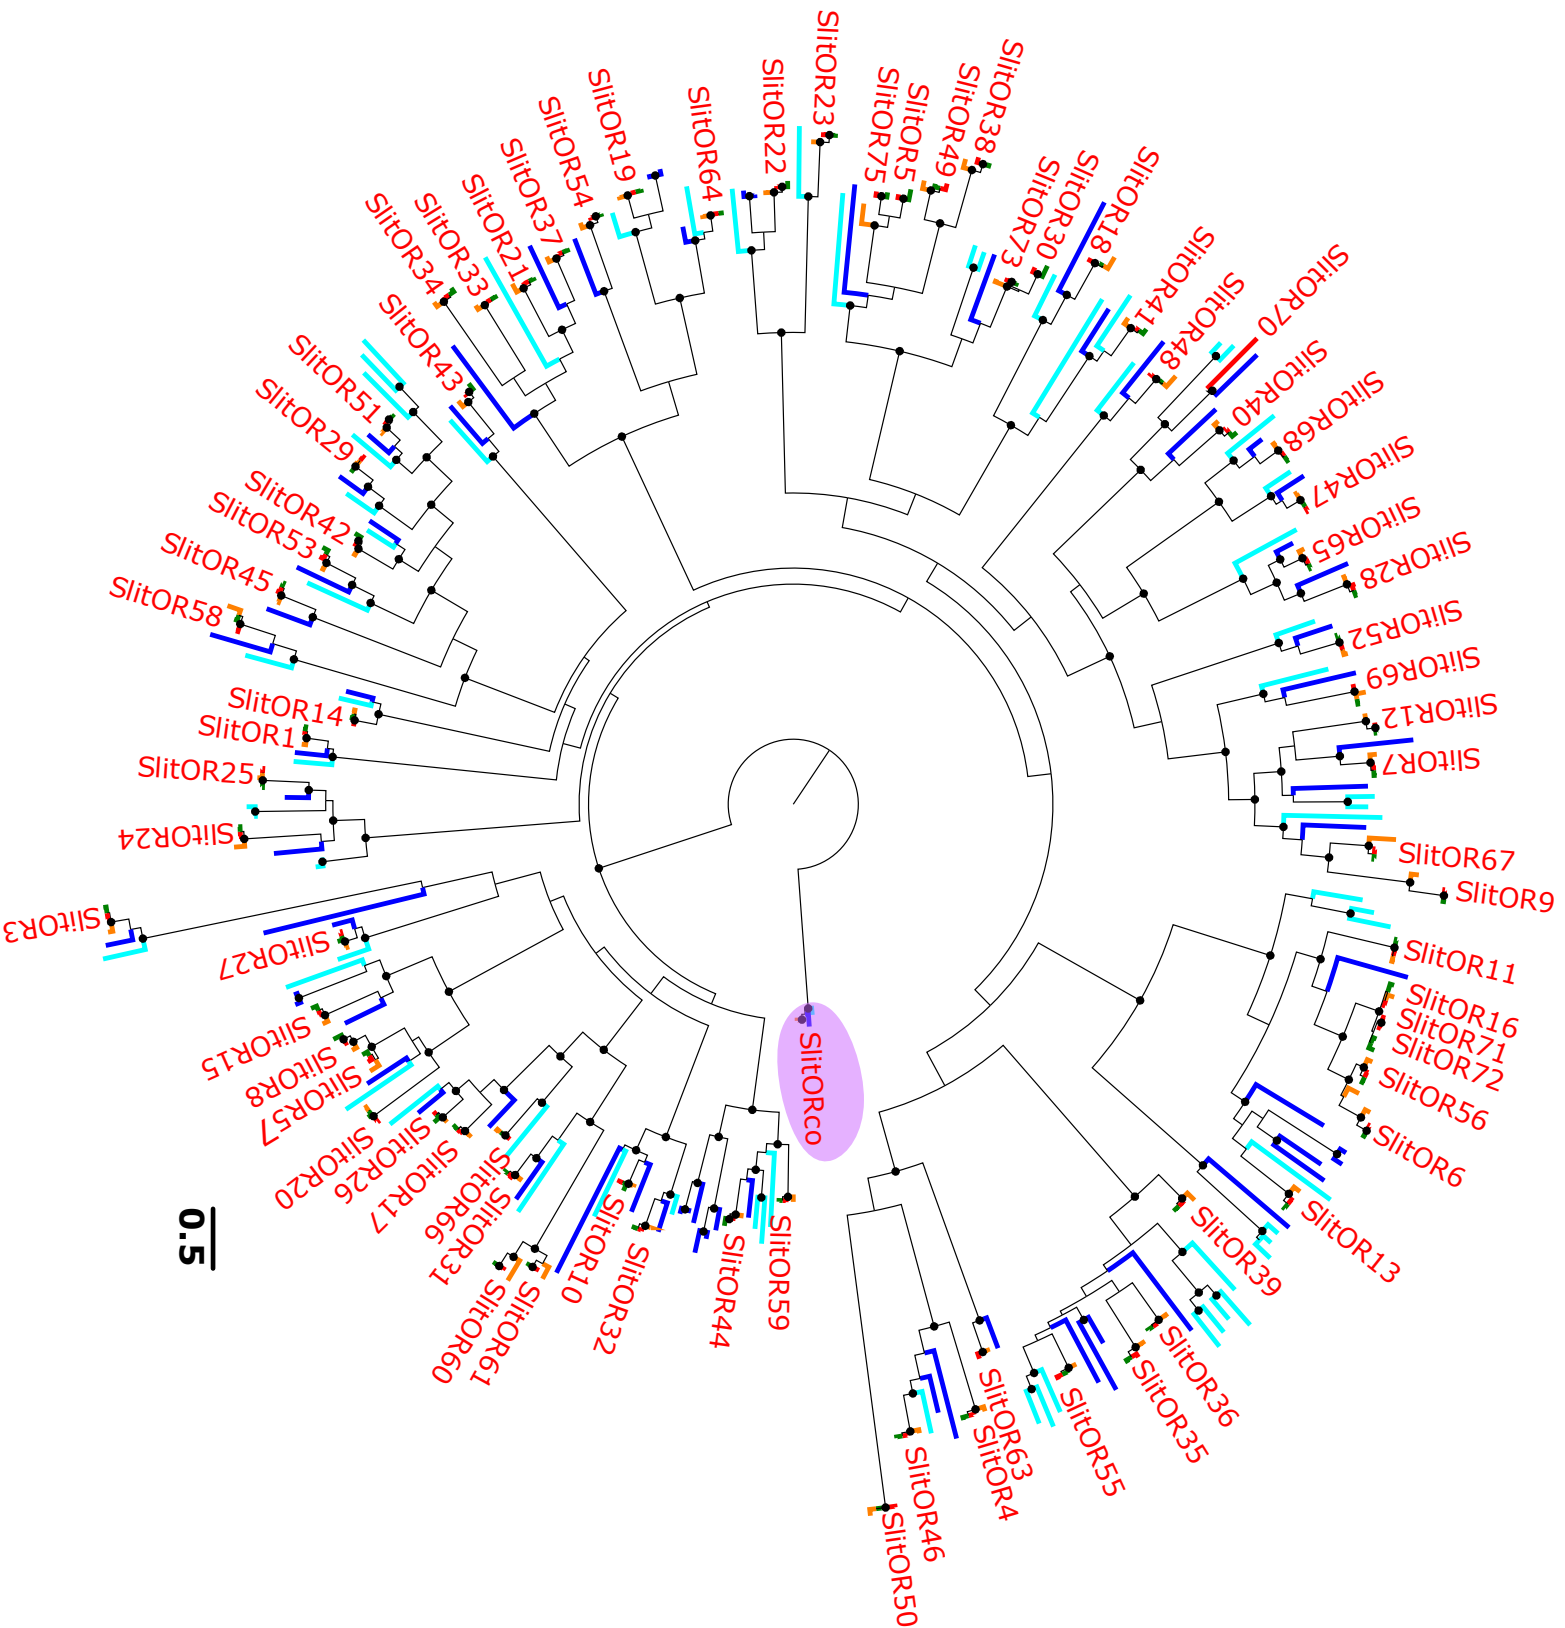

Source: https://www.biorxiv.org/content/biorxiv/early/2021/12/09/2021.12.09.471925.full.pdf
